# Supplementary material for: Unraveling the Dynamics of Omicron (BA.1, BA.2, and BA.5) Waves and Emergence of the Deltacton Variant: Genomic Epidemiology of the SARS-CoV-2 Epidemic in Cyprus (Oct 2021–Oct 2022)
Source: MDPI journal article supplement (doi:10.3390/v15091933), 2023-09-15
Supplement: s1 [file s1]

Table S1. Common S Protein Mutations of Delta and Omicron Lineages that were Identified in this Dataset<sup>a</sup>.

[illegible]

|     |         |      |                    |       |       |       |       |       |       |                    |                    |        |
|-----|---------|------|--------------------|-------|-------|-------|-------|-------|-------|--------------------|--------------------|--------|
| 2   | AY.6    | T19R | G142D <sup>d</sup> | ΔE156 | ΔF157 | R158G | L452R | T478K | D614G | P681R              | D950N              |        |
|     |         | 2    | 1                  | 2     | 2     | 2     | 2     | 2     | 2     | 2                  | 2                  |        |
| 22  | AY.7.2  | T19R | ΔE156              | ΔF157 | R158G | L452R | T478K | D614G | P681R | A688V <sup>e</sup> | D950N              |        |
|     |         | 22   | 19                 | 19    | 19    | 22    | 22    | 22    | 22    | 17                 | 20                 |        |
| 5   | AY.9.2  | T19R | ΔE156              | ΔF157 | R158G | A222V | L452R | T478K | D614G | P681R              | D950N              |        |
|     |         | 5    | 5                  | 5     | 5     | 5     | 5     | 5     | 5     | 5                  | 5                  |        |
| 1   | AY.23   | T19R | ΔE156              | ΔF157 | R158G | L452R | T478K | D614G | P681R | D950N              | V1264L             |        |
|     |         | 1    | 1                  | 1     | 1     | 1     | 1     | 1     | 1     | 1                  | 1                  |        |
| 1   | AY.25   | T19R | ΔE156              | ΔF157 | R158G | L452R | T478K | D614G | P681R | D950N              |                    |        |
|     |         | 1    | 1                  | 1     | 1     | 1     | 1     | 1     | 1     | 1                  |                    |        |
| 1   | AY.33   | T19R | T29A               | G142D | ΔE156 | ΔF157 | R158G | T250I | L452R | T478K              | D614G              | P681R  |
|     |         | 1    | 1                  | 1     | 1     | 1     | 1     | 1     | 1     | 1                  | 1                  | 1      |
| 1   | AY.34   | T19R | T95I               | ΔE156 | ΔF157 | R158G | L452R | T478K | D614G | Q677H              | P681R              | D950N  |
|     |         | 1    | 1                  | 1     | 1     | 1     | 1     | 1     | 1     | 1                  | 1                  | 1      |
| 1   | AY.34.1 | T19R | T95I               | ΔE156 | ΔF157 | R158G | L452R | T478K | D614G | Q677H              | P681R              |        |
|     |         | 1    | 1                  | 1     | 1     | 1     | 1     | 1     | 1     | 1                  | 1                  |        |
| 4   | AY.36   | T19R | T95I               | ΔE156 | ΔF157 | R158G | L452R | T478K | D614G | P681R              | D950N <sup>d</sup> | V1104L |
|     |         | 4    | 4                  | 4     | 4     | 4     | 4     | 4     | 4     | 4                  | 2                  | 4      |
| 1   | AY.42   | T19R | T95I               | ΔE156 | ΔF157 | R158G | L452R | T478K | D614G | P681R              |                    |        |
|     |         | 1    | 1                  | 1     | 1     | 1     | 1     | 1     | 1     | 1                  |                    |        |
| 197 | AY.43   | T19R | ΔE156              | ΔF157 | R158G | L452R | T478K | D614G | P681R | D950N              |                    |        |
|     |         | 197  | 192                | 192   | 192   | 197   | 197   | 197   | 197   | 150                |                    |        |
| 1   | AY.43.8 | T19R | G142D              | ΔE156 | ΔF157 | R158G | L452R | T478K | D614G | P681R              |                    |        |
|     |         | 1    | 1                  | 1     | 1     | 1     | 1     | 1     | 1     | 1                  |                    |        |
| 2   | AY.46.5 | T19R | ΔE156              | ΔF157 | R158G | L452R | T478K | D614G | P681R |                    |                    |        |
|     |         | 2    | 2                  | 2     | 2     | 2     | 2     | 2     | 2     |                    |                    |        |
| 4   | AY.46.6 | T19R | ΔE156              | ΔF157 | R158G | L452R | T478K | D614G | P681R | D950N <sup>d</sup> |                    |        |
|     |         | 4    | 4                  | 4     | 4     | 4     | 4     | 4     | 4     | 1                  |                    |        |
| 2   | AY.60   | T19R | ΔE156              | ΔF157 | R158G | A222V | L452R | T478K | D614G | P681R              | D950N              |        |
|     |         | 2    | 2                  | 2     | 2     | 2     | 2     | 2     | 2     | 2                  | 2                  |        |
| 32  | AY.98   | T19R | G142D <sup>d</sup> | ΔE156 | ΔF157 | R158G | L452R | T478K | D614G | P681R              | D950N              |        |

[illegible]

|     |          |       |       |                    |       |       |       |       |       |       |                    |                    |
|-----|----------|-------|-------|--------------------|-------|-------|-------|-------|-------|-------|--------------------|--------------------|
| 1   | AY.124.1 | T19R  | T95I  | ΔE156              | ΔF157 | R158G | L452R | T478K | D614G | P681R | D950N              |                    |
|     |          | 1     | 1     | 1                  | 1     | 1     | 1     | 1     | 1     | 1     | 1                  |                    |
| 3   | AY.125   | T19R  | T95I  | ΔE156              | ΔF157 | R158G | L452R | T478K | D614G | P681R | D950N <sup>d</sup> |                    |
|     |          | 3     | 3     | 3                  | 3     | 3     | 3     | 3     | 3     | 3     | 2                  |                    |
| 18  | AY.126   | T19R  | T95I  | ΔE156              | ΔF157 | R158G | L452R | T478K | D614G | P681R | I850L              | D950N              |
|     |          | 18    | 14    | 17                 | 17    | 17    | 18    | 18    | 18    | 18    | 17                 | 16                 |
| 44  | AY.127   | T19R  | T95I  | G142D <sup>d</sup> | ΔE156 | ΔF157 | R158G | L452R | T478K | D614G | P681R              | D950N              |
|     |          | 44    | 41    | 10                 | 44    | 44    | 44    | 44    | 44    | 44    | 44                 | 42                 |
| 1   | AY.127.2 | T19R  | ΔE156 | ΔF157              | R158G | L452R | T478K | D614G | P681R | T859N | D950N              |                    |
|     |          | 1     | 1     | 1                  | 1     | 1     | 1     | 1     | 1     | 1     | 1                  |                    |
| 2   | AY.128   | T19R  | T95I  | G142D              | ΔE156 | ΔF157 | R158G | L452R | T478K | D614G | P681R              | D950N <sup>d</sup> |
|     |          | 2     | 2     | 2                  | 2     | 2     | 2     | 2     | 2     | 2     | 2                  | 1                  |
| 1   | AY.129   | T19R  | T95I  | ΔE156              | ΔF157 | R158G | L452R | T478K | D614G | P681R | D950N              |                    |
|     |          | 1     | 1     | 1                  | 1     | 1     | 1     | 1     | 1     | 1     | 1                  |                    |
| 337 | BA.1     | A67V  | ΔH69  | ΔV70               | T95I  | ΔG142 | ΔV143 | ΔY144 | Y145D | ΔN211 | L212I              | ins214EPE          |
|     |          | 336   | 336   | 336                | 337   | 337   | 337   | 337   | 337   | 319   | 319                | 304                |
|     |          | G339D | S371L | S373P              | S375F | K417N | N440K | G446S | S477N | T478K | E484A              | Q493R              |
|     |          | 335   | 323   | 325                | 326   | 310   | 316   | 331   | 327   | 328   | 326                | 331                |
|     |          | G496S | Q498R | N501Y              | Y505H | T547K | D614G | H655Y | N679K | P681H | N764K              | D796Y              |
|     |          | 331   | 330   | 330                | 330   | 336   | 337   | 337   | 337   | 337   | 336                | 337                |
|     |          | N856K | Q954H | N969K              | L981F |       |       |       |       |       |                    |                    |
|     |          | 337   | 337   | 337                | 337   |       |       |       |       |       |                    |                    |
| 529 | BA.1.1   | A67V  | ΔH69  | ΔV70               | T95I  | ΔG142 | ΔV143 | ΔY144 | Y145D | ΔN211 | L212I              | ins214EPE          |
|     |          | 529   | 529   | 529                | 529   | 529   | 529   | 528   | 529   | 522   | 522                | 512                |
|     |          | G339D | R346K | S371L              | S373P | S375F | K417N | N440K | G446S | S477N | T478K              | E484A              |
|     |          | 528   | 528   | 523                | 524   | 524   | 518   | 527   | 525   | 525   | 525                | 524                |
|     |          | Q493R | G496S | Q498R              | N501Y | Y505H | T547K | D614G | H655Y | N679K | P681H              | N764K              |
|     |          | 525   | 525   | 525                | 525   | 526   | 529   | 529   | 529   | 529   | 529                | 529                |
|     |          | D796Y | N856K | Q954H              | N969K | L981F |       |       |       |       |                    |                    |
|     |          | 529   | 528   | 529                | 529   | 529   |       |       |       |       |                    |                    |
| 71  | BA.1.1.1 | A67V  | ΔH69  | ΔV70               | T95I  | ΔG142 | ΔV143 | ΔY144 | Y145D | ΔN211 | L212I              | ins214EPE          |

|   |           |       |       |       |       |       |                    |       |       |       |       |           |           |
|---|-----------|-------|-------|-------|-------|-------|--------------------|-------|-------|-------|-------|-----------|-----------|
|   |           |       | 71    | 71    | 71    | 71    | 71                 | 71    | 71    | 70    | 70    | 65        |           |
|   |           |       | G339D | R346K | S371L | S373P | S375F              | K417N | N440K | G446S | S477N | T478K     | E484A     |
|   |           |       | 71    | 71    | 69    | 69    | 69                 | 69    | 70    | 71    | 68    | 68        | 69        |
|   |           |       | Q493R | G496S | Q498R | N501Y | Y505H              | T547K | D614G | H655Y | N679K | P681H     | N764K     |
|   |           |       | 70    | 70    | 70    | 69    | 69                 | 71    | 71    | 71    | 71    | 71        | 71        |
|   |           |       | D796Y | N856K | Q954H | N969K | L981F              |       |       |       |       |           |           |
|   |           |       | 71    | 71    | 71    | 71    | 71                 |       |       |       |       |           |           |
| 2 | BA.1.1.11 | A67V  | ΔH69  | ΔV70  | T95I  | ΔG142 | ΔV143              | ΔY144 | Y145D | ΔN211 | L212I | ins214EPE |           |
|   |           | 2     | 2     | 2     | 2     | 2     | 2                  | 2     | 2     | 2     | 2     | 2         |           |
|   |           | G339D | R346K | S371L | S373P | S375F | K417N <sup>d</sup> | N440K | G446S | S477N | T478K | E484A     |           |
|   |           | 2     | 2     | 2     | 2     | 2     | 1                  | 2     | 2     | 2     | 2     | 2         |           |
|   |           | Q493R | G496S | Q498R | N501Y | Y505H | T547K              | D614G | H655Y | N679K | P681H | N764K     |           |
|   |           | 2     | 2     | 2     | 2     | 2     | 2                  | 2     | 2     | 2     | 2     | 2         |           |
|   |           | D796Y | N856K | Q954H | N969K | L981F |                    |       |       |       |       |           |           |
|   |           |       | 2     | 2     | 2     | 2     | 2                  |       |       |       |       |           |           |
|   |           |       | A67V  | ΔH69  | ΔV70  | T95I  | ΔG142              | ΔV143 | ΔY144 | Y145D | ΔN211 | L212I     | ins214EPE |
|   |           |       | 1     | 1     | 1     | 1     | 1                  | 1     | 1     | 1     | 1     | 1         | 1         |
|   |           |       | G339D | R346K | S371L | S373P | S375F              | K417N | N440K | G446S | S477N | T478K     | E484A     |
|   |           |       | 1     | 1     | 1     | 1     | 1                  | 1     | 1     | 1     | 1     | 1         | 1         |
|   |           |       | Q493R | G496S | Q498R | N501Y | Y505H              | T547K | D614G | H655Y | N679K | P681H     | N764K     |
|   |           |       | 1     | 1     | 1     | 1     | 1                  | 1     | 1     | 1     | 1     | 1         | 1         |
|   |           |       | D796Y | N856K | Q954H | N969K | L981F              |       |       |       |       |           |           |
|   |           |       | 1     | 1     | 1     | 1     | 1                  |       |       |       |       |           |           |
|   |           |       | A67V  | ΔH69  | ΔV70  | T95I  | ΔG142              | ΔV143 | ΔY144 | Y145D | ΔN211 | L212I     | ins214EPE |
|   |           |       | 157   | 157   | 157   | 157   | 157                | 157   | 157   | 157   | 154   | 154       | 151       |
|   |           |       | G339D | R346K | S371L | S373P | S375F              | K417N | N440K | G446S | S477N | T478K     | E484A     |
|   |           |       | 157   | 157   | 156   | 156   | 156                | 155   | 155   | 156   | 155   | 155       | 157       |
|   |           |       | Q493R | G496S | Q498R | N501Y | Y505H              | T547K | D614G | H655Y | N679K | P681H     | N764K     |
|   |           |       | 156   | 156   | 156   | 156   | 156                | 157   | 157   | 157   | 157   | 157       |           |
|   |           |       | D796Y | N856K | Q954H | N969K | L981F              |       |       |       |       |           |           |
|   |           |       | 157   | 157   | 157   | 157   | 157                |       |       |       |       |           |           |



[illegible]

|     |           |                    |                    |                    |                    |       |                    |                    |                    |                    |                    |                        |
|-----|-----------|--------------------|--------------------|--------------------|--------------------|-------|--------------------|--------------------|--------------------|--------------------|--------------------|------------------------|
|     |           | N856K              | Q954H              | N969K              | L981F              |       |                    |                    |                    |                    |                    |                        |
|     |           | 16                 | 16                 | 16                 | 16                 |       |                    |                    |                    |                    |                    |                        |
| 99  | BA.1.17   | A67V               | ΔH69               | ΔV70               | T95I               | ΔG142 | ΔV143              | ΔY144              | Y145D              | ΔN211              | L212I              | ins214EPE              |
|     |           | 99                 | 99                 | 99                 | 98                 | 99    | 99                 | 99                 | 99                 | 92                 | 92                 | 87                     |
|     |           | G339D              | S371L              | S373P              | S375F              | K417N | N440K              | G446S              | S477N              | T478K              | E484A              | Q493R                  |
|     |           | 96                 | 94                 | 94                 | 94                 | 92    | 97                 | 98                 | 98                 | 98                 | 97                 | 96                     |
|     |           | G496S              | Q498R              | N501Y              | Y505H              | T547K | D614G              | H655Y              | N679K              | P681H              | N764K              | D796Y                  |
|     |           | 97                 | 98                 | 97                 | 97                 | 99    | 98                 | 98                 | 99                 | 99                 | 99                 | 99                     |
|     |           | N856K              | Q954H              | N969K              | L981F              |       |                    |                    |                    |                    |                    |                        |
|     |           | 99                 | 99                 | 99                 | 99                 |       |                    |                    |                    |                    |                    |                        |
| 194 | BA.1.17.2 | A67V               | ΔH69               | ΔV70               | T95I               | ΔG142 | ΔV143              | ΔY144              | Y145D              | ΔN211              | L212I              | ins214EPE              |
|     |           | 194                | 194                | 194                | 194                | 194   | 194                | 194                | 194                | 186                | 186                | 180                    |
|     |           | G339D              | S371L              | S373P              | S375F              | K417N | N440K              | G446S              | S477N              | T478K              | E484A              | Q493R                  |
|     |           | 193                | 192                | 193                | 193                | 179   | 186                | 190                | 192                | 192                | 192                | 193                    |
|     |           | G496S              | Q498R              | N501Y              | Y505H              | T547K | D614G              | H655Y              | N679K              | P681H              | A701V              | N764K                  |
|     |           | 191                | 191                | 191                | 190                | 194   | 194                | 194                | 194                | 194                | 194                | 194                    |
|     |           | D796Y              | N856K              | Q954H              | N969K              | L981F |                    |                    |                    |                    |                    |                        |
|     |           | 194                | 194                | 194                | 194                | 194   |                    |                    |                    |                    |                    |                        |
| 14  | BA.1.18   | A67V               | ΔH69               | ΔV70               | T95I               | ΔG142 | ΔV143              | ΔY144              | Y145D              | ΔN211              | L212I              | ins214EPE              |
|     |           | 14                 | 14                 | 14                 | 14                 | 14    | 14                 | 14                 | 14                 | 13                 | 13                 | 13                     |
|     |           | G339D              | S371L              | S373P              | S375F              | K417N | N440K              | G446S              | S477N              | T478K              | E484A              | Q493R                  |
|     |           | 14                 | 13                 | 13                 | 13                 | 12    | 12                 | 13                 | 13                 | 13                 | 13                 | 13                     |
|     |           | G496S              | Q498R              | N501Y              | Y505H              | T547K | D614G              | H655Y              | N679K              | P681H              | N764K              | D796Y                  |
|     |           | 13                 | 13                 | 13                 | 13                 | 13    | 14                 | 14                 | 14                 | 14                 | 14                 | 14                     |
|     |           | N856K              | Q954H              | N969K              | L981F              |       |                    |                    |                    |                    |                    |                        |
|     |           | 14                 | 14                 | 14                 | 14                 |       |                    |                    |                    |                    |                    |                        |
| 2   | BA.1.19   | A67V               | ΔH69               | ΔV70               | T95I               | ΔG142 | ΔV143              | ΔY144              | Y145D              | ΔN211 <sup>d</sup> | L212I <sup>d</sup> | ins214EPE <sup>d</sup> |
|     |           | 2                  | 2                  | 2                  | 2                  | 2     | 2                  | 2                  | 2                  | 1                  | 1                  | 1                      |
|     |           | G339D              | S371L <sup>d</sup> | S373P <sup>d</sup> | S375F <sup>d</sup> | K417N | N440K <sup>d</sup> | G446S <sup>d</sup> | S477N <sup>d</sup> | T478K <sup>d</sup> | E484A <sup>d</sup> | Q493R <sup>d</sup>     |
|     |           | 2                  | 1                  | 1                  | 1                  | 2     | 1                  | 1                  | 1                  | 1                  | 1                  | 1                      |
|     |           | G496S <sup>d</sup> | Q498R <sup>d</sup> | N501Y <sup>d</sup> | Y505H <sup>d</sup> | T547K | D614G              | H655Y              | N679K              | P681H              | N764K              | D796Y                  |





|    |           |       |       |       |       |       |       |       |       |       |       |       |
|----|-----------|-------|-------|-------|-------|-------|-------|-------|-------|-------|-------|-------|
| 1  | BA.2.2    | T19I  | ΔL24  | ΔP25  | ΔP26  | A27S  | G142D | V213G | G339D | S371F | S373P | S375F |
|    |           | 1     | 1     | 1     | 1     | 1     | 1     | 1     | 1     | 1     | 1     | 1     |
|    |           | T376A | D405N | R408S | K417N | N440K | S477N | T478K | E484A | Q493R | Q498R | N501Y |
|    |           | 1     | 1     | 1     | 1     | 1     | 1     | 1     | 1     | 1     | 1     | 1     |
|    |           | Y505H | D614G | H655Y | N679K | P681H | N764K | D796Y | Q954H | N969K |       |       |
|    |           | 1     | 1     | 1     | 1     | 1     | 1     | 1     | 1     | 1     |       |       |
| 49 | BA.2.3    | T19I  | ΔL24  | ΔP25  | ΔP26  | A27S  | G142D | V213G | G339D | S371F | S373P | S375F |
|    |           | 49    | 49    | 49    | 49    | 49    | 49    | 49    | 49    | 49    | 49    | 49    |
|    |           | T376A | D405N | R408S | K417N | N440K | S477N | T478K | E484A | Q493R | Q498R | N501Y |
|    |           | 49    | 49    | 49    | 49    | 49    | 49    | 49    | 49    | 49    | 49    | 49    |
|    |           | Y505H | D614G | H655Y | N679K | P681H | N764K | D796Y | Q954H | N969K |       |       |
|    |           | 49    | 49    | 49    | 49    | 49    | 49    | 49    | 49    | 49    |       |       |
| 1  | BA.2.3.15 | T19I  | ΔL24  | ΔP25  | ΔP26  | A27S  | G142D | V213G | D215E | G339D | S371F | S373P |
|    |           | 1     | 1     | 1     | 1     | 1     | 1     | 1     | 1     | 1     | 1     | 1     |
|    |           | S375F | T376A | D405N | R408S | K417N | N440K | S477N | T478K | E484A | Q493R | Q498R |
|    |           | 1     | 1     | 1     | 1     | 1     | 1     | 1     | 1     | 1     | 1     | 1     |
|    |           | N501Y | Y505H | D614G | H655Y | N679K | P681H | N764K | D796Y | Q954H | N969K |       |
|    |           | 1     | 1     | 1     | 1     | 1     | 1     | 1     | 1     | 1     | 1     |       |
| 6  | BA.2.3.20 | T19I  | ΔL24  | ΔP25  | ΔP26  | A27S  | G142D | M153T | N164K | V213G | H245N | G257D |
|    |           | 6     | 6     | 6     | 6     | 6     | 6     | 6     | 6     | 6     | 6     | 6     |
|    |           | G339D | S371F | S373P | S375F | T376A | D405N | R408S | K417N | N440K | K444R | N450D |
|    |           | 6     | 6     | 6     | 6     | 6     | 6     | 6     | 6     | 6     | 6     | 6     |
|    |           | L452M | N460K | S477N | T478K | E484R | Q498R | N501Y | Y505H | D614G | H655Y | N679K |
|    |           | 6     | 6     | 6     | 6     | 6     | 6     | 6     | 6     | 6     | 6     | 6     |
|    |           | P681H | N764K | D796Y | Q954H | N969K |       |       |       |       |       |       |
|    |           | 6     | 6     | 6     | 6     | 6     |       |       |       |       |       |       |
| 5  | BA.2.5    | T19I  | ΔL24  | ΔP25  | ΔP26  | A27S  | G142D | V213G | G339D | S371F | S373P | S375F |
|    |           | 5     | 5     | 5     | 5     | 5     | 5     | 5     | 5     | 5     | 5     | 5     |
|    |           | T376A | D405N | R408S | K417N | N440K | S477N | T478K | E484A | Q493R | Q498R | N501Y |
|    |           | 5     | 5     | 5     | 5     | 5     | 5     | 5     | 5     | 5     | 5     | 5     |
|    |           | Y505H | D614G | H655Y | N679K | P681H | N764K | D796Y | Q954H | N969K |       |       |

[illegible]

|    |           |       |       |       |       |       |       |       |       |       |       |       |
|----|-----------|-------|-------|-------|-------|-------|-------|-------|-------|-------|-------|-------|
| 47 | BA.2.12.1 | T19I  | ΔL24  | ΔP25  | ΔP26  | A27S  | G142D | V213G | G339D | S371F | S373P | S375F |
|    |           | 47    | 47    | 47    | 47    | 47    | 47    | 47    | 47    | 47    | 47    | 47    |
|    |           | T376A | D405N | R408S | K417N | N440K | L452Q | S477N | T478K | E484A | Q493R | Q498R |
|    |           | 47    | 47    | 47    | 47    | 47    | 47    | 47    | 47    | 47    | 47    | 47    |
|    |           | N501Y | Y505H | D614G | H655Y | N679K | P681H | S704L | N764K | D796Y | Q954H | N969K |
|    |           | 47    | 47    | 47    | 47    | 47    | 47    | 47    | 47    | 47    | 47    | 47    |
| 3  | BA.2.18   | T19I  | ΔL24  | ΔP25  | ΔP26  | A27S  | G142D | V213G | G339D | S371F | S373P | S375F |
|    |           | 3     | 3     | 3     | 3     | 3     | 3     | 3     | 3     | 3     | 3     | 3     |
|    |           | T376A | D405N | R408S | K417T | N440K | S477N | T478K | E484A | Q493R | Q498R | N501Y |
|    |           | 3     | 3     | 3     | 3     | 3     | 3     | 3     | 3     | 3     | 3     | 3     |
|    |           | Y505H | D614G | H655Y | N679K | P681H | N764K | D796Y | Q954H | N969K |       |       |
|    |           | 3     | 3     | 3     | 3     | 3     | 3     | 3     | 3     | 3     |       |       |
| 2  | BA.2.19   | T19I  | ΔL24  | ΔP25  | ΔP26  | A27S  | G142D | V213G | G339D | S371F | S373P | S375F |
|    |           | 2     | 2     | 2     | 2     | 2     | 2     | 2     | 2     | 2     | 2     | 2     |
|    |           | T376A | D405N | R408S | K417N | N440K | S477N | T478K | E484A | Q493R | Q498R | N501Y |
|    |           | 2     | 2     | 2     | 2     | 2     | 2     | 2     | 2     | 2     | 2     | 2     |
|    |           | Y505H | D614G | H655Y | N679K | P681H | N764K | D796Y | Q954H | N969K |       |       |
|    |           | 2     | 2     | 2     | 2     | 2     | 2     | 2     | 2     | 2     |       |       |
| 1  | BA.2.23   | T19I  | ΔL24  | ΔP25  | ΔP26  | A27S  | G142D | V213G | G339D | S371F | S373P | S375F |
|    |           | 1     | 1     | 1     | 1     | 1     | 1     | 1     | 1     | 1     | 1     | 1     |
|    |           | T376A | D405N | R408S | K417N | N440K | S477N | T478K | E484A | Q493R | Q498R | N501Y |
|    |           | 1     | 1     | 1     | 1     | 1     | 1     | 1     | 1     | 1     | 1     | 1     |
|    |           | Y505H | D614G | H655Y | N679K | P681H | N764K | D796Y | Q954H | N969K |       |       |
|    |           | 1     | 1     | 1     | 1     | 1     | 1     | 1     | 1     | 1     |       |       |
| 1  | BA.2.23.1 | T19I  | ΔL24  | ΔP25  | ΔP26  | A27S  | G142D | V213G | G339D | S371F | S373P | S375F |
|    |           | 1     | 1     | 1     | 1     | 1     | 1     | 1     | 1     | 1     | 1     | 1     |
|    |           | T376A | D405N | R408S | K417N | N440K | S477N | T478K | E484A | Q493R | Q498R | N501Y |
|    |           | 1     | 1     | 1     | 1     | 1     | 1     | 1     | 1     | 1     | 1     | 1     |
|    |           | Y505H | D614G | H655Y | N679K | P681H | N764K | D796Y | Q954H | N969K |       |       |
|    |           | 1     | 1     | 1     | 1     | 1     | 1     | 1     | 1     | 1     |       |       |
| 1  | BA.2.31   | T19I  | ΔL24  | ΔP25  | ΔP26  | A27S  | G142D | V213G | G339D | S371F | S373P | S375F |

[illegible]

|   |         |       |       |       |       |       |       |       |       |       |       |        |       |
|---|---------|-------|-------|-------|-------|-------|-------|-------|-------|-------|-------|--------|-------|
|   |         |       | T376A | D405N | R408S | K417N | N440K | S477N | T478K | E484A | Q493R | Q498R  | N501Y |
|   |         |       | 1     | 1     | 1     | 1     | 1     | 1     | 1     | 1     | 1     | 1      | 1     |
|   |         |       | Y505H | D614G | H655Y | N679K | P681H | N764K | D796Y | Q954H | N969K | T1231S |       |
|   |         |       | 1     | 1     | 1     | 1     | 1     | 1     | 1     | 1     | 1     | 1      |       |
| 1 | BA.2.56 | T19I  | ΔL24  | ΔP25  | ΔP26  | A27S  | G142D | V213G | G339D | S371F | S373P | S375F  |       |
|   |         | 1     | 1     | 1     | 1     | 1     | 1     | 1     | 1     | 1     | 1     | 1      |       |
|   |         | T376A | D405N | R408S | K417N | N440K | L452M | S477N | T478K | E484A | Q493R | Q498R  |       |
|   |         | 1     | 1     | 1     | 1     | 1     | 1     | 1     | 1     | 1     | 1     | 1      |       |
|   |         | N501Y | Y505H | D614G | H655Y | N679K | P681H | N764K | D796Y | Q954H | N969K |        |       |
|   |         | 1     | 1     | 1     | 1     | 1     | 1     | 1     | 1     | 1     | 1     |        |       |
| 3 | BA.2.63 | T19I  | ΔL24  | ΔP25  | ΔP26  | A27S  | G142D | V213G | G339D | S371F | S373P | S375F  |       |
|   |         | 3     | 3     | 3     | 3     | 3     | 3     | 3     | 3     | 3     | 3     | 3      |       |
|   |         | T376A | D405N | R408S | K417N | N440K | S477N | T478K | E484A | Q493R | Q498R | N501Y  |       |
|   |         | 3     | 3     | 3     | 3     | 3     | 3     | 3     | 3     | 3     | 3     | 3      |       |
|   |         | Y505H | D614G | H655Y | N679K | P681H | N764K | D796Y | Q954H | N969K |       |        |       |
|   |         | 3     | 3     | 3     | 3     | 3     | 3     | 3     | 3     | 3     |       |        |       |
| 6 | BA.2.65 | T19I  | ΔL24  | ΔP25  | ΔP26  | A27S  | G142D | V213G | G339D | S371F | S373P | S375F  |       |
|   |         | 6     | 6     | 6     | 6     | 6     | 6     | 6     | 6     | 5     | 5     | 5      |       |
|   |         | T376A | D405N | R408S | K417N | N440K | S477N | T478K | E484A | Q493R | Q498R | N501Y  |       |
|   |         | 5     | 6     | 6     | 6     | 6     | 6     | 6     | 6     | 6     | 6     | 6      |       |
|   |         | Y505H | D614G | H655Y | N679K | P681H | N764K | D796Y | Q954H | N969K |       |        |       |
|   |         | 6     | 6     | 6     | 6     | 6     | 6     | 6     | 6     | 6     |       |        |       |
| 1 | BA.2.68 | T19I  | ΔL24  | ΔP25  | ΔP26  | A27S  | G142D | V213G | G339D | S371F | S373P | S375F  |       |
|   |         | 1     | 1     | 1     | 1     | 1     | 1     | 1     | 1     | 1     | 1     | 1      |       |
|   |         | T376A | D405N | R408S | K417N | N440K | S477N | T478K | E484A | Q493R | Q498R | N501Y  |       |
|   |         | 1     | 1     | 1     | 1     | 1     | 1     | 1     | 1     | 1     | 1     | 1      |       |
|   |         | Y505H | D614G | H655Y | N679K | P681H | N764K | D796Y | Q954H | N969K |       |        |       |
|   |         | 1     | 1     | 1     | 1     | 1     | 1     | 1     | 1     | 1     |       |        |       |
| 4 | BA.2.71 | T19I  | ΔL24  | ΔP25  | ΔP26  | A27S  | W64R  | G142D | V213G | G339D | S371F | S373P  |       |
|   |         | 4     | 4     | 4     | 4     | 4     | 4     | 4     | 4     | 4     | 4     | 4      |       |
|   |         | S375F | T376A | D405N | R408S | K417N | N440K | S477N | T478K | E484A | Q493R | Q498R  |       |

[illegible]

|    |         | D614G | H655Y | N679K | P681H | N764K | D796Y | Q954H | N969K |       |       |       |  |
|----|---------|-------|-------|-------|-------|-------|-------|-------|-------|-------|-------|-------|--|
|    |         | 1     | 1     | 1     | 1     | 1     | 1     | 1     | 1     |       |       |       |  |
| 1  | XL      | T19I  | ΔL24  | ΔP25  | ΔP26  | A27S  | G142D | V213G | G339D | S371F | S373P | S375F |  |
|    |         | 1     | 1     | 1     | 1     | 1     | 1     | 1     | 1     | 1     | 1     | 1     |  |
|    |         | T376A | D405N | R408S | K417N | N440K | S477N | T478K | E484A | Q493R | Q498R | N501Y |  |
|    |         | 1     | 1     | 1     | 1     | 1     | 1     | 1     | 1     | 1     | 1     | 1     |  |
|    |         | Y505H | D614G | H655Y | N679K | P681H | N764K | D796Y | Q954H | N969K |       |       |  |
|    |         | 1     | 1     | 1     | 1     | 1     | 1     | 1     | 1     | 1     |       |       |  |
|    |         |       |       |       |       |       |       |       |       |       |       |       |  |
| 3  | XAL     | L8F   | T19I  | ΔL24  | ΔP25  | ΔP26  | A27S  | G142D | V213G | G339D | S371F | S373P |  |
|    |         | 3     | 3     | 3     | 3     | 3     | 3     | 3     | 3     | 3     | 3     | 3     |  |
|    |         | S375F | T376A | D405N | R408S | K417N | N440K | S477N | T478K | E484A | Q493R | Q498R |  |
|    |         | 3     | 3     | 3     | 3     | 3     | 3     | 3     | 3     | 3     | 3     | 3     |  |
|    |         | N501Y | Y505H | D614G | H655Y | N679K | P681H | N764K | D796Y | Q954H | N969K |       |  |
|    |         | 3     | 3     | 3     | 3     | 3     | 3     | 3     | 3     | 3     | 3     |       |  |
| 1  | BA.2.78 | T19I  | ΔL24  | ΔP25  | ΔP26  | A27S  | G142D | V213G | G339D | S371F | S373P | S375F |  |
|    |         | 1     | 1     | 1     | 1     | 1     | 1     | 1     | 1     | 1     | 1     | 1     |  |
|    |         | T376A | D405N | R408S | K417N | N440K | S477N | T478K | E484A | Q493R | Q498R | N501Y |  |
|    |         | 1     | 1     | 1     | 1     | 1     | 1     | 1     | 1     | 1     | 1     | 1     |  |
|    |         | Y505H | D614G | H655Y | N679K | P681H | N764K | D796Y | Q954H | N969K |       |       |  |
|    |         | 1     | 1     | 1     | 1     | 1     | 1     | 1     | 1     | 1     |       |       |  |
| 48 | BA.4    | T19I  | ΔL24  | ΔP25  | ΔP26  | A27S  | ΔH69  | ΔV70  | G142D | V213G | G339D | S371F |  |
|    |         | 48    | 48    | 48    | 48    | 48    | 48    | 48    | 48    | 48    | 48    | 48    |  |
|    |         | S373P | S375F | T376A | D405N | R408S | K417N | N440K | L452R | S477N | T478K | E484A |  |
|    |         | 48    | 48    | 48    | 48    | 48    | 48    | 48    | 48    | 48    | 48    | 48    |  |
|    |         | F486V | Q498R | N501Y | Y505H | D614G | H655Y | N679K | P681H | N764K | D796Y | Q954H |  |
|    |         | 48    | 48    | 48    | 48    | 48    | 48    | 48    | 48    | 48    | 48    | 48    |  |
|    |         | N969K |       |       |       |       |       |       |       |       |       |       |  |
|    |         | 48    |       |       |       |       |       |       |       |       |       |       |  |
| 22 | BA.4.1  | V3G   | T19I  | ΔL24  | ΔP25  | ΔP26  | A27S  | ΔH69  | ΔV70  | G142D | V213G | G339D |  |
|    |         | 22    | 22    | 22    | 22    | 22    | 22    | 22    | 22    | 22    | 22    | 22    |  |
|    |         | S371F | S373P | S375F | T376A | D405N | R408S | K417N | N440K | L452R | S477N | T478K |  |





|     |          |       |       |       |       |       |       |       |       |       |       |       |
|-----|----------|-------|-------|-------|-------|-------|-------|-------|-------|-------|-------|-------|
|     |          | S371F | S373P | S375F | T376A | D405N | R408S | K417N | N440K | L452R | S477N | T478K |
|     |          | 2     | 2     | 2     | 2     | 2     | 2     | 2     | 2     | 2     | 2     | 2     |
|     |          | E484A | F486V | Q498R | N501Y | Y505H | D614G | H655Y | N658S | N679K | P681H | N764K |
|     |          | 2     | 2     | 2     | 2     | 2     | 2     | 2     | 2     | 2     | 2     | 2     |
|     |          | D796Y | Q954H | N969K |       |       |       |       |       |       |       |       |
|     |          | 2     | 2     | 2     |       |       |       |       |       |       |       |       |
|     |          |       |       |       |       |       |       |       |       |       |       |       |
| 1   | BA.4.7   | T19I  | ΔL24  | ΔP25  | ΔP26  | A27S  | ΔH69  | ΔV70  | G142D | V213G | G339D | R346S |
|     |          | 1     | 1     | 1     | 1     | 1     | 1     | 1     | 1     | 1     | 1     | 1     |
|     |          | S371F | S373P | S375F | T376A | D405N | R408S | K417N | N440K | L452R | S477N | T478K |
|     |          | 1     | 1     | 1     | 1     | 1     | 1     | 1     | 1     | 1     | 1     | 1     |
|     |          | E484A | F486V | Q498R | N501Y | Y505H | D614G | H655Y | N658S | N679K | P681H | N764K |
|     |          | 1     | 1     | 1     | 1     | 1     | 1     | 1     | 1     | 1     | 1     | 1     |
|     |          | D796Y | Q954H | N969K |       |       |       |       |       |       |       |       |
| 6   | BA.5     | 1     | 1     | 1     |       |       |       |       |       |       |       |       |
|     |          | T19I  | ΔL24  | ΔP25  | ΔP26  | A27S  | ΔH69  | ΔV70  | G142D | V213G | G339D | S371F |
|     |          | 6     | 6     | 6     | 6     | 6     | 6     | 6     | 6     | 6     | 6     | 6     |
|     |          | S373P | S375F | T376A | D405N | R408S | K417N | N440K | L452R | S477N | T478K | E484A |
|     |          | 6     | 6     | 6     | 6     | 6     | 6     | 6     | 6     | 6     | 6     | 6     |
|     |          | F486V | Q498R | N501Y | Y505H | D614G | H655Y | N679K | P681H | N764K | D796Y | Q954H |
|     |          | 6     | 6     | 6     | 6     | 6     | 6     | 6     | 6     | 6     | 6     | 6     |
| 258 | BA.5.1   | N969K |       |       |       |       |       |       |       |       |       |       |
|     |          | 6     |       |       |       |       |       |       |       |       |       |       |
|     |          | T19I  | ΔL24  | ΔP25  | ΔP26  | A27S  | ΔH69  | ΔV70  | G142D | V213G | G339D | S371F |
|     |          | 258   | 258   | 258   | 258   | 258   | 258   | 258   | 257   | 258   | 258   | 257   |
|     |          | S373P | S375F | T376A | D405N | R408S | K417N | N440K | L452R | S477N | T478K | E484A |
|     |          | 258   | 258   | 258   | 258   | 256   | 257   | 257   | 257   | 258   | 258   | 258   |
|     |          | F486V | Q498R | N501Y | Y505H | D614G | H655Y | N679K | P681H | N764K | D796Y | Q954H |
| 1   | BA.5.1.1 | 258   | 258   | 258   | 258   | 258   | 258   | 258   | 258   | 258   | 258   | 258   |
|     |          | N969K |       |       |       |       |       |       |       |       |       |       |
| 1   | BA.5.1.1 | 258   |       |       |       |       |       |       |       |       |       |       |
|     |          | T19I  | ΔL24  | ΔP25  | ΔP26  | A27S  | ΔH69  | ΔV70  | G142D | V213G | G339D | S371F |





|     |           |       |       |       |       |       |       |       |       |       |       |       |
|-----|-----------|-------|-------|-------|-------|-------|-------|-------|-------|-------|-------|-------|
|     |           | 1     |       |       |       |       |       |       |       |       |       |       |
| 2   | BA.5.1.22 | T19I  | ΔL24  | ΔP25  | ΔP26  | A27S  | ΔH69  | ΔV70  | G142D | V213G | G339D | S371F |
|     |           | 2     | 2     | 2     | 2     | 2     | 2     | 2     | 2     | 2     | 2     | 2     |
|     |           | S373P | S375F | T376A | D405N | R408S | K417N | N440K | L452R | S477N | T478K | E484A |
|     |           | 2     | 2     | 2     | 2     | 2     | 2     | 2     | 2     | 2     | 2     | 2     |
|     |           | F486V | Q498R | N501Y | Y505H | D614G | H655Y | N679K | P681H | N764K | D796Y | Q954H |
|     |           | 2     | 2     | 2     | 2     | 2     | 2     | 2     | 2     | 2     | 2     | 2     |
|     |           | N969K |       |       |       |       |       |       |       |       |       |       |
|     |           | 2     |       |       |       |       |       |       |       |       |       |       |
| 2   | BA.5.1.23 | T19I  | ΔL24  | ΔP25  | ΔP26  | A27S  | ΔH69  | ΔV70  | G142D | V213G | G339D | S371F |
|     |           | 2     | 2     | 2     | 2     | 2     | 2     | 2     | 2     | 2     | 2     | 2     |
|     |           | S373P | S375F | T376A | D405N | R408S | K417N | N440K | L452R | S477N | T478K | E484A |
|     |           | 2     | 2     | 2     | 2     | 2     | 2     | 2     | 2     | 2     | 2     | 2     |
|     |           | F486V | Q498R | N501Y | Y505H | D614G | H655Y | N679K | P681H | N764K | D796Y | Q954H |
|     |           | 2     | 2     | 2     | 2     | 2     | 2     | 2     | 2     | 2     | 2     | 2     |
|     |           | N969K |       |       |       |       |       |       |       |       |       |       |
|     |           | 2     |       |       |       |       |       |       |       |       |       |       |
| 223 | BA.5.2    | T19I  | ΔL24  | ΔP25  | ΔP26  | A27S  | ΔH69  | ΔV70  | G142D | V213G | G339D | S371F |
|     |           | 223   | 223   | 223   | 223   | 223   | 223   | 223   | 223   | 223   | 223   | 223   |
|     |           | S373P | S375F | T376A | D405N | R408S | K417N | N440K | L452R | S477N | T478K | E484A |
|     |           | 223   | 223   | 223   | 223   | 223   | 223   | 223   | 223   | 223   | 223   | 223   |
|     |           | F486V | Q498R | N501Y | Y505H | D614G | H655Y | N679K | P681H | N764K | D796Y | Q954H |
|     |           | 223   | 223   | 223   | 223   | 223   | 222   | 223   | 223   | 223   | 223   | 223   |
|     |           | N969K |       |       |       |       |       |       |       |       |       |       |
|     |           | 223   |       |       |       |       |       |       |       |       |       |       |
| 139 | BA.5.2.1  | T19I  | ΔL24  | ΔP25  | ΔP26  | A27S  | ΔH69  | ΔV70  | G142D | V213G | G339D | S371F |
|     |           | 139   | 139   | 139   | 139   | 139   | 139   | 139   | 139   | 137   | 139   | 139   |
|     |           | S373P | S375F | T376A | D405N | R408S | K417N | N440K | L452R | S477N | T478K | E484A |
|     |           | 139   | 139   | 139   | 139   | 139   | 139   | 139   | 139   | 139   | 139   | 139   |
|     |           | F486V | Q498R | N501Y | Y505H | D614G | H655Y | N679K | P681H | N764K | D796Y | Q954H |
|     |           | 139   | 139   | 139   | 139   | 138   | 138   | 139   | 139   | 139   | 139   | 139   |

|       |       |       |       |       |       |       |       |       |                    |                    |       |       |       |       |
|-------|-------|-------|-------|-------|-------|-------|-------|-------|--------------------|--------------------|-------|-------|-------|-------|
| 11    | BF.1  | N969K |       |       |       |       |       |       |                    |                    |       |       |       |       |
|       |       | 139   |       |       |       |       |       |       |                    |                    |       |       |       |       |
|       |       | T19I  | ΔL24  | ΔP25  | ΔP26  | A27S  | ΔH69  | ΔV70  | G142D              | V213G              | G339D | S371F |       |       |
|       |       | 11    | 11    | 11    | 11    | 11    | 11    | 11    | 11                 | 11                 | 11    | 11    |       |       |
|       |       | S373P | S375F | T376A | D405N | R408S | K417N | N440K | L452R              | S477N              | T478K | E484A |       |       |
|       |       | 11    | 11    | 11    | 11    | 11    | 11    | 11    | 11                 | 11                 | 11    | 11    |       |       |
|       |       | F486V | Q498R | N501Y | Y505H | D614G | H655Y | N679K | P681H              | N764K              | D796Y | Q954H |       |       |
|       |       | 11    | 11    | 11    | 11    | 11    | 11    | 11    | 11                 | 11                 | 11    | 11    |       |       |
|       |       | N969K |       |       |       |       |       |       |                    |                    |       |       |       |       |
|       |       | 11    |       |       |       |       |       |       |                    |                    |       |       |       |       |
| 1     | BF.2  | T19I  | ΔL24  | ΔP25  | ΔP26  | A27S  | ΔH69  | ΔV70  | G142D              | V213G              | G339D | S371F |       |       |
|       |       | 1     | 1     | 1     | 1     | 1     | 1     | 1     | 1                  | 1                  | 1     | 1     |       |       |
|       |       | S373P | S375F | T376A | D405N | R408S | K417N | N440K | L452R              | S477N              | T478K | E484A |       |       |
|       |       | 1     | 1     | 1     | 1     | 1     | 1     | 1     | 1                  | 1                  | 1     | 1     |       |       |
|       |       | F486V | Q498R | N501Y | Y505H | D614G | H655Y | N679K | P681H              | N764K              | D796Y | Q954H |       |       |
|       |       | 1     | 1     | 1     | 1     | 1     | 1     | 1     | 1                  | 1                  | 1     | 1     |       |       |
|       |       | N969K |       |       |       |       |       |       |                    |                    |       |       |       |       |
|       |       | 1     |       |       |       |       |       |       |                    |                    |       |       |       |       |
|       |       | 3     | BF.4  | T19I  | ΔL24  | ΔP25  | ΔP26  | A27S  | ΔH69               | ΔV70               | G142D | V213G | T259A | G339D |
|       |       |       |       | 3     | 3     | 3     | 3     | 3     | 3                  | 3                  | 3     | 3     | 3     | 3     |
| S371F | S373P |       |       | S375F | T376A | D405N | R408S | K417N | N440K <sup>d</sup> | L452R <sup>d</sup> | S477N | T478K |       |       |
| 3     | 3     |       |       | 3     | 3     | 3     | 3     | 3     | 2                  | 2                  | 3     | 3     |       |       |
| E484A | F486V |       |       | Q498R | N501Y | Y505H | D614G | H655Y | N679K              | P681H              | N764K | D796Y |       |       |
| 3     | 3     |       |       | 3     | 3     | 3     | 3     | 3     | 3                  | 3                  | 3     | 3     |       |       |
| Q954H | N969K |       |       |       |       |       |       |       |                    |                    |       |       |       |       |
| 3     |       |       |       |       |       |       |       |       |                    |                    |       |       |       |       |
| 25    | BF.5  |       |       | T19I  | ΔL24  | ΔP25  | ΔP26  | A27S  | ΔH69               | ΔV70               | G142D | V213G | G339D | S371F |
|       |       |       |       | 25    | 25    | 25    | 25    | 25    | 25                 | 25                 | 25    | 25    | 25    | 25    |
|       |       | S373P | S375F | T376A | D405N | R408S | K417N | N440K | L452R              | S477N              | T478K | E484A |       |       |
|       |       | 25    | 25    | 25    | 25    | 25    | 25    | 25    | 25                 | 25                 | 25    | 25    |       |       |
|       |       | F486V | Q498R | N501Y | Y505H | D614G | H655Y | N679K | P681H              | N764K              | D796Y | Q954H |       |       |
|       |       |       |       |       |       |       |       |       |                    |                    |       |       |       |       |

[illegible]

|    |          | Q954H | N969K |       |       |       |       |       |       |       |       |       |
|----|----------|-------|-------|-------|-------|-------|-------|-------|-------|-------|-------|-------|
|    |          | 1     | 1     |       |       |       |       |       |       |       |       |       |
| 1  | BF.7.5.1 | T19I  | ΔL24  | ΔP25  | ΔP26  | A27S  | ΔH69  | ΔV70  | G142D | ΔY144 | G181V | V213G |
|    |          | 1     | 1     | 1     | 1     | 1     | 1     | 1     | 1     | 1     | 1     | 1     |
|    |          | G339D | R346T | S371F | S373P | S375F | T376A | D405N | R408S | K417N | N440K | L452R |
|    |          | 1     | 1     | 1     | 1     | 1     | 1     | 1     | 1     | 1     | 1     | 1     |
|    |          | S477N | T478K | E484A | F486V | Q498R | N501Y | Y505H | D614G | H655Y | N679K | P681H |
|    |          | 1     | 1     | 1     | 1     | 1     | 1     | 1     | 1     | 1     | 1     | 1     |
|    |          | N764K | D796Y | Q954H | N969K |       |       |       |       |       |       |       |
|    |          | 1     | 1     | 1     | 1     |       |       |       |       |       |       |       |
| 1  | BF.7.8   | T19I  | ΔL24  | ΔP25  | ΔP26  | A27S  | ΔH69  | ΔV70  | G142D | V213G | G339D | R346T |
|    |          | 1     | 1     | 1     | 1     | 1     | 1     | 1     | 1     | 1     | 1     | 1     |
|    |          | S371F | S373P | S375F | T376A | D405N | R408S | K417N | N440K | L452R | S477N | T478K |
|    |          | 1     | 1     | 1     | 1     | 1     | 1     | 1     | 1     | 1     | 1     | 1     |
|    |          | E484A | F486V | Q498R | N501Y | Y505H | D614G | H655Y | N679K | P681H | N764K | D796Y |
|    |          | 1     | 1     | 1     | 1     | 1     | 1     | 1     | 1     | 1     | 1     | 1     |
|    |          | T883I | Q954H | N969K |       |       |       |       |       |       |       |       |
|    |          | 1     | 1     | 1     |       |       |       |       |       |       |       |       |
| 5  | BF.10    | T19I  | ΔL24  | ΔP25  | ΔP26  | A27S  | ΔH69  | ΔV70  | G142D | V213G | G339D | S371F |
|    |          | 5     | 5     | 5     | 5     | 5     | 5     | 5     | 5     | 5     | 5     | 5     |
|    |          | S373P | S375F | T376A | D405N | R408S | K417N | N440K | L452R | S477N | T478K | E484A |
|    |          | 5     | 5     | 5     | 5     | 5     | 5     | 5     | 5     | 5     | 5     | 5     |
|    |          | F486V | Q498R | N501Y | Y505H | D614G | H655Y | N679K | P681H | N764K | D796Y | Q954H |
|    |          | 5     | 5     | 5     | 5     | 5     | 5     | 5     | 5     | 5     | 5     | 5     |
|    |          | N969K |       |       |       |       |       |       |       |       |       |       |
|    |          | 5     |       |       |       |       |       |       |       |       |       |       |
| 11 | BF.11    | T19I  | ΔL24  | ΔP25  | ΔP26  | A27S  | ΔH69  | ΔV70  | G142D | V213G | G339D | R346T |
|    |          | 11    | 11    | 11    | 11    | 11    | 11    | 11    | 11    | 11    | 11    | 11    |
|    |          | S371F | S373P | S375F | T376A | D405N | R408S | K417N | N440K | L452R | S477N | T478K |
|    |          | 11    | 11    | 11    | 11    | 11    | 11    | 11    | 11    | 11    | 11    | 11    |
|    |          | E484A | F486V | Q498R | N501Y | Y505H | D614G | H655Y | N679K | P681H | N764K | D796Y |
|    |          |       |       |       |       |       |       |       |       |       |       |       |





|   |           |       |       |       |       |       |       |       |       |       |       |       |
|---|-----------|-------|-------|-------|-------|-------|-------|-------|-------|-------|-------|-------|
|   |           | F486V | Q498R | N501Y | Y505H | D614G | H655Y | N679K | P681H | N764K | D796Y | Q954H |
|   |           | 1     | 1     | 1     | 1     | 1     | 1     | 1     | 1     | 1     | 1     | 1     |
|   |           | N969K |       |       |       |       |       |       |       |       |       |       |
|   |           | 1     |       |       |       |       |       |       |       |       |       |       |
| 5 | BA.5.2.3  | T19I  | ΔL24  | ΔP25  | ΔP26  | A27S  | ΔH69  | ΔV70  | G142D | V213G | G339D | S371F |
|   |           | 5     | 5     | 5     | 5     | 5     | 5     | 5     | 5     | 5     | 5     | 5     |
|   |           | S373P | S375F | T376A | D405N | R408S | K417N | N440K | L452R | S477N | T478K | E484A |
|   |           | 5     | 5     | 5     | 5     | 5     | 5     | 5     | 5     | 5     | 5     | 5     |
|   |           | F486V | Q498R | N501Y | Y505H | D614G | H655Y | N679K | P681H | N764K | D796Y | Q954H |
|   |           | 5     | 5     | 5     | 5     | 5     | 5     | 5     | 5     | 5     | 5     | 5     |
|   |           | N969K |       |       |       |       |       |       |       |       |       |       |
|   |           | 5     |       |       |       |       |       |       |       |       |       |       |
| 1 | BA.5.2.13 | T19I  | ΔL24  | ΔP25  | ΔP26  | A27S  | ΔH69  | ΔV70  | G142D | V213G | G339D | R346T |
|   |           | 1     | 1     | 1     | 1     | 1     | 1     | 1     | 1     | 1     | 1     | 1     |
|   |           | S371F | S373P | S375F | T376A | D405N | R408S | K417N | N440K | L452R | S477N | T478K |
|   |           | 1     | 1     | 1     | 1     | 1     | 1     | 1     | 1     | 1     | 1     | 1     |
|   |           | E484A | F486V | Q498R | N501Y | Y505H | D614G | H655Y | N679K | P681H | N764K | D796Y |
|   |           | 1     | 1     | 1     | 1     | 1     | 1     | 1     | 1     | 1     | 1     | 1     |
|   |           | Q954H | N969K |       |       |       |       |       |       |       |       |       |
|   |           | 1     | 1     |       |       |       |       |       |       |       |       |       |
| 1 | BA.5.2.14 | T19I  | ΔL24  | ΔP25  | ΔP26  | A27S  | W64L  | ΔH69  | ΔV70  | G142D | V213G | G339D |
|   |           | 1     | 1     | 1     | 1     | 1     | 1     | 1     | 1     | 1     | 1     | 1     |
|   |           | S371F | S373P | S375F | T376A | D405N | R408S | K417N | N440K | K444M | L452R | S477N |
|   |           | 1     | 1     | 1     | 1     | 1     | 1     | 1     | 1     | 1     | 1     | 1     |
|   |           | T478K | E484A | F486V | Q498R | N501Y | Y505H | D614G | H655Y | N679K | P681H | N764K |
|   |           | 1     | 1     | 1     | 1     | 1     | 1     | 1     | 1     | 1     | 1     | 1     |
|   |           | D796Y | Q954H | N969K |       |       |       |       |       |       |       |       |
|   |           | 1     | 1     | 1     |       |       |       |       |       |       |       |       |
| 1 | BA.5.2.18 | T19I  | ΔL24  | ΔP25  | ΔP26  | A27S  | ΔH69  | ΔV70  | G142D | V213G | G339D | S371F |
|   |           | 1     | 1     | 1     | 1     | 1     | 1     | 1     | 1     | 1     | 1     | 1     |
|   |           | S373P | S375F | T376A | D405N | R408S | K417N | N440K | K444R | L452R | S477N | T478K |



|   |           |       |       |       |       |       |       |       |       |       |       |       |
|---|-----------|-------|-------|-------|-------|-------|-------|-------|-------|-------|-------|-------|
|   |           | S373P | S375F | T376A | D405N | R408S | K417N | N440K | L452R | S477N | T478K | E484A |
|   |           | 1     | 1     | 1     | 1     | 1     | 1     | 1     | 1     | 1     | 1     | 1     |
|   |           | F486V | Q498R | N501Y | Y505H | D614G | H655Y | N679K | P681H | N764K | D796Y | Q954H |
|   |           | 1     | 1     | 1     | 1     | 1     | 1     | 1     | 1     | 1     | 1     | 1     |
|   |           | N969K |       |       |       |       |       |       |       |       |       |       |
|   |           | 1     |       |       |       |       |       |       |       |       |       |       |
|   |           | T19I  | ΔL24  | ΔP25  | ΔP26  | A27S  | ΔH69  | ΔV70  | G142D | V213G | G339D | S371F |
| 2 | BA.5.2.33 | 2     | 2     | 2     | 2     | 2     | 2     | 2     | 2     | 2     | 2     | 2     |
|   |           | S373P | S375F | T376A | D405N | R408S | K417N | N440K | L452R | S477N | T478K | E484A |
|   |           | 2     | 2     | 2     | 2     | 2     | 2     | 2     | 2     | 2     | 2     | 2     |
|   |           | F486V | Q498R | N501Y | Y505H | D614G | H655Y | N679K | P681H | N764K | D796Y | Q954H |
|   |           | 2     | 2     | 2     | 2     | 2     | 2     | 2     | 2     | 2     | 2     | 2     |
|   |           | N969K |       |       |       |       |       |       |       |       |       |       |
|   |           | 2     |       |       |       |       |       |       |       |       |       |       |
| 1 | BA.5.2.35 | T19I  | ΔL24  | ΔP25  | ΔP26  | A27S  | ΔH69  | ΔV70  | G142D | V213G | G339D | R346T |
|   |           | 1     | 1     | 1     | 1     | 1     | 1     | 1     | 1     | 1     | 1     | 1     |
|   |           | S371F | S373P | S375F | T376A | D405N | R408S | K417N | N440K | L452R | S477N | T478K |
|   |           | 1     | 1     | 1     | 1     | 1     | 1     | 1     | 1     | 1     | 1     | 1     |
|   |           | E484A | F486V | Q498R | N501Y | Y505H | D614G | H655Y | N679K | P681H | N764K | D796Y |
|   |           | 1     | 1     | 1     | 1     | 1     | 1     | 1     | 1     | 1     | 1     | 1     |
|   |           | Q954H | N969K |       |       |       |       |       |       |       |       |       |
| 1 | BA.5.3    | 1     | 1     |       |       |       |       |       |       |       |       |       |
|   |           | T19I  | ΔL24  | ΔP25  | ΔP26  | A27S  | ΔH69  | ΔV70  | G142D | V213G | G339D | S371F |
|   |           | 1     | 1     | 1     | 1     | 1     | 1     | 1     | 1     | 1     | 1     | 1     |
|   |           | S373P | S375F | T376A | D405N | R408S | K417N | N440K | L452R | S477N | T478K | E484A |
|   |           | 1     | 1     | 1     | 1     | 1     | 1     | 1     | 1     | 1     | 1     | 1     |
|   |           | F486V | Q498R | N501Y | Y505H | D614G | H655Y | N679K | P681H | N764K | D796Y | Q954H |
|   |           | 1     | 1     | 1     | 1     | 1     | 1     | 1     | 1     | 1     | 1     | 1     |
| 1 | BA.5.3.1  | N969K |       |       |       |       |       |       |       |       |       |       |
|   |           | 1     |       |       |       |       |       |       |       |       |       |       |
| 1 | BA.5.3.1  | T19I  | ΔL24  | ΔP25  | ΔP26  | A27S  | ΔH69  | ΔV70  | G142D | V213G | G339D | S371F |





[illegible]





|       |        |        |       |       |       |       |       |       |       |       |       |       |
|-------|--------|--------|-------|-------|-------|-------|-------|-------|-------|-------|-------|-------|
| 2     | BA.5.8 | 5      | 5     | 5     | 5     | 5     | 5     | 5     | 5     | 5     | 5     |       |
|       |        | N969K  |       |       |       |       |       |       |       |       |       |       |
|       |        | 5      |       |       |       |       |       |       |       |       |       |       |
|       |        | T19I   | ΔL24  | ΔP25  | ΔP26  | A27S  | ΔH69  | ΔV70  | G142D | V213G | G339D | S371F |
|       |        | 2      | 2     | 2     | 2     | 2     | 2     | 2     | 2     | 2     | 2     | 2     |
|       |        | S373P  | S375F | T376A | D405N | R408S | K417N | N440K | L452R | S477N | T478K | E484A |
|       |        | 2      | 2     | 2     | 2     | 2     | 2     | 2     | 2     | 2     | 2     | 2     |
|       |        | F486V  | Q498R | N501Y | Y505H | D614G | H655Y | N679K | P681H | N764K | D796Y | Q954H |
|       |        | 2      | 2     | 2     | 2     | 2     | 2     | 2     | 2     | 2     | 2     | 2     |
| N969K |        | P1162L |       |       |       |       |       |       |       |       |       |       |
| 2     |        | 2      |       |       |       |       |       |       |       |       |       |       |
| 11    | BA.5.9 | T19I   | ΔL24  | ΔP25  | ΔP26  | A27S  | ΔH69  | ΔV70  | G142D | V213G | G339D | R346I |
|       |        | 11     | 11    | 11    | 11    | 11    | 11    | 11    | 11    | 11    | 11    | 11    |
|       |        | S371F  | S373P | S375F | T376A | D405N | R408S | K417N | N440K | L452R | S477N | T478K |
|       |        | 11     | 11    | 11    | 11    | 11    | 11    | 11    | 11    | 11    | 11    | 11    |
|       |        | E484A  | F486V | Q498R | N501Y | Y505H | D614G | H655Y | N679K | P681H | N764K | D796Y |
|       |        | 11     | 11    | 11    | 11    | 11    | 11    | 11    | 11    | 11    | 11    | 11    |
|       |        | Q954H  | N969K |       |       |       |       |       |       |       |       |       |
|       |        | 11     | 11    |       |       |       |       |       |       |       |       |       |

<sup>a</sup>The most prevalent mutations shown in Table S1 were determined in accordance to the most prevalent mutations of these lineages in this dataset, and as denoted by the CoV-Spectrum [1] (<http://cov-spectrum.org/>)(date last accessed 23 May 2023) and Outbreak.info [2] (<http://outbreak.info/>)(date last accessed 23 May 2023) websites.

<sup>b</sup>Total number of sequences that were identified for each lineage in this dataset.

<sup>c</sup>For lineages that were identified in lower frequency in this dataset, the CoV-Spectrum [1] (<http://cov-spectrum.org/>)( date last accessed 23 May 2023) and Outbreak.info [2] (<http://outbreak.info/>)( date last accessed 23 May 2023) websites were used to indicate the expected common mutations and deletions

<sup>d</sup>Mutations that are listed as common (above 75% prevalence) by CoV-Spectrum [1] (<http://cov-spectrum.org/>)( date last accessed 23 May 2023) and Outbreak.info [2] (<http://outbreak.info/>)( date last accessed 23 May 2023) websites, for a specific lineage but were found in lower frequencies (below 75%) in this dataset.

<sup>e</sup>Mutations that are listed as below 75% prevalence in CoV-Spectrum [1] (<http://cov-spectrum.org/>)( date last accessed 23 May 2023) and Outbreak.info [2] (<http://outbreak.info/>)( date last accessed 23 May 2023) websites, but were found in higher frequencies (above 75%) in this dataset for specific lineages.

Table S2. Uncommon S Protein Mutations of Delta and Omicron Lineages that were Identified in this Dataset<sup>a</sup>.

| Total Sequences <sup>b</sup> | Lineage <sup>c</sup> | Mutations and Number of Sequences Identified for Each Mutation |        |        |       |       |       |       |       |       |       |        |
|------------------------------|----------------------|----------------------------------------------------------------|--------|--------|-------|-------|-------|-------|-------|-------|-------|--------|
| 47                           | B.1.617.2            | S60F                                                           | A67V   | ΔH69   | H69Y  | ΔV70  | P85L  | T95I  | ΔG142 | ΔV143 | ΔY144 | Y145D  |
|                              |                      | 1                                                              | 2      | 2      | 1     | 2     | 1     | 34    | 2     | 2     | 3     | 2      |
|                              |                      | R237K                                                          | R273T  | A372V  | Q474H | P521S | E554Q | T572I | Q677H | A688V | P812L | A1020V |
|                              |                      | 1                                                              | 1      | 2      | 2     | 1     | 6     | 3     | 3     | 2     | 1     | 1      |
|                              |                      | P1162S                                                         | G1167V |        |       |       |       |       |       |       |       |        |
|                              |                      | 2                                                              | 1      |        |       |       |       |       |       |       |       |        |
| 2                            | AY.3                 | Q613H                                                          | A1020S | V1176F |       |       |       |       |       |       |       |        |
|                              |                      | 1                                                              | 1      | 1      |       |       |       |       |       |       |       |        |
| 106                          | AY.4                 | L5F                                                            | V6F    | L8V    | S13T  | L18F  | T33I  | A67V  | ΔH69  | ΔV70  | R102S | D138H  |
|                              |                      | 3                                                              | 1      | 1      | 4     | 3     | 3     | 4     | 4     | 4     | 1     | 3      |
|                              |                      | ΔG142                                                          | ΔV143  | ΔY144  | Y145D | E180V | G181V | L189F | P209S | A222S | A222V | D228G  |
|                              |                      | 2                                                              | 3      | 2      | 2     | 2     | 5     | 1     | 1     | 1     | 2     | 3      |
|                              |                      | F238L                                                          | W258L  | G339V  | N501S | E554G | E554R | T572I | P809S | T859I | S939F | L1063F |
|                              |                      | 1                                                              | 1      | 1      | 1     | 1     | 1     | 6     | 1     | 2     | 2     | 1      |
|                              |                      | V1104L                                                         | G1131A | L1141F |       |       |       |       |       |       |       |        |
|                              |                      | 1                                                              | 1      | 1      |       |       |       |       |       |       |       |        |
| 38                           | AY.4.2               | V36F                                                           | A67V   | ΔH69   | ΔV70  | T73I  | ΔG142 | ΔV143 | ΔY144 | Y145D | E154A | D228H  |
|                              |                      | 25                                                             | 3      | 3      | 3     | 1     | 2     | 2     | 2     | 2     | 5     | 1      |
|                              |                      | P809S                                                          | S1252F |        |       |       |       |       |       |       |       |        |
|                              |                      | 1                                                              | 1      |        |       |       |       |       |       |       |       |        |
| 4                            | AY.4.5               | L18F                                                           |        |        |       |       |       |       |       |       |       |        |
|                              |                      | 1                                                              |        |        |       |       |       |       |       |       |       |        |
| 3                            | AY.5                 | L5F                                                            | V62L   |        |       |       |       |       |       |       |       |        |
|                              |                      | 1                                                              | 1      |        |       |       |       |       |       |       |       |        |
| 2                            | AY.6                 | T22I                                                           | A67V   | T95I   |       |       |       |       |       |       |       |        |
|                              |                      | 2                                                              | 2      | 1      |       |       |       |       |       |       |       |        |
| 22                           | AY.7.2               | G142D                                                          | A260V  |        |       |       |       |       |       |       |       |        |
|                              |                      | 5                                                              | 1      |        |       |       |       |       |       |       |       |        |
| 5                            | AY.9.2               | P25S                                                           | P26S   | F490S  |       |       |       |       |       |       |       |        |

|     |         |        |        |        |        |        |        |        |        |        |        |        |
|-----|---------|--------|--------|--------|--------|--------|--------|--------|--------|--------|--------|--------|
|     |         |        | 1      | 1      | 1      |        |        |        |        |        |        |        |
| 1   | AY.23   | S254F  |        |        |        |        |        |        |        |        |        |        |
|     |         | 1      |        |        |        |        |        |        |        |        |        |        |
| 1   | AY.25   | S112L  |        |        |        |        |        |        |        |        |        |        |
|     |         | 1      |        |        |        |        |        |        |        |        |        |        |
| 1   | AY.34   | A67V   | ΔH69   | ΔV70   | K854E  |        |        |        |        |        |        |        |
|     |         | 1      | 1      | 1      | 1      |        |        |        |        |        |        |        |
| 4   | AY.36   | L5F    | G142D  | A222V  | E484Q  | V1122L |        |        |        |        |        |        |
|     |         | 1      | 1      | 1      | 1      | 1      |        |        |        |        |        |        |
| 1   | AY.42   | G142D  | D215Y  |        |        |        |        |        |        |        |        |        |
|     |         | 1      | 1      |        |        |        |        |        |        |        |        |        |
| 197 | AY.43   | L5F    | P26L   | N30H   | H49Y   | S50A   | T51S   | A67V   | ΔH69   | H69Y   | ΔV70   | G75V   |
|     |         | 4      | 1      | 1      | 1      | 1      | 1      | 5      | 6      | 1      | 6      | 3      |
|     |         | R78S   | D80Y   | T95I   | S112L  | ΔG142  | G142D  | ΔV143  | ΔY144  | Y145D  | Q173H  | G181V  |
|     |         | 2      | 1      | 12     | 1      | 1      | 54     | 1      | 5      | 1      | 1      | 3      |
|     |         | V193L  | D215H  | P217S  | H245Y  | D253G  | T323I  | N354K  | P463S  | P621S  | ΔN679  | S680T  |
|     |         | 2      | 1      | 1      | 1      | 46     | 1      | 1      | 1      | 41     | 1      | 1      |
|     |         | T739I  | L752F  | T859I  | A890V  | K921E  | D950S  | N955S  | M1029V | A1078S | H1088Y | V1122L |
|     |         | 1      | 1      | 1      | 1      | 1      | 1      | 1      | 1      | 48     | 1      | 2      |
|     |         | G1124V | V1176F | I1227L | C1247F | S1252P | D1259Y | D1260Y |        |        |        |        |
| 5   | 10      | 1      | 2      | 1      | 3      | 15     |        |        |        |        |        |        |
| 1   | AY.43.8 | T323I  |        |        |        |        |        |        |        |        |        |        |
|     |         | 1      |        |        |        |        |        |        |        |        |        |        |
| 4   | AY.46.6 | G142D  |        |        |        |        |        |        |        |        |        |        |
|     |         | 1      |        |        |        |        |        |        |        |        |        |        |
| 2   | AY.60   | G142D  |        |        |        |        |        |        |        |        |        |        |
|     |         | 2      |        |        |        |        |        |        |        |        |        |        |
| 32  | AY.98   | V70A   | V90F   | P174S  | T376I  | N440Y  | T523I  | T1009I | T1120I | V1176F |        |        |
|     |         | 1      | 2      | 1      | 1      | 2      | 1      | 1      | 17     | 1      |        |        |
| 11  | AY.98.1 | D80Y   | S98F   |        |        |        |        |        |        |        |        |        |
|     |         | 1      | 3      |        |        |        |        |        |        |        |        |        |

|     |          |        |        |        |        |        |        |       |       |        |        |        |  |
|-----|----------|--------|--------|--------|--------|--------|--------|-------|-------|--------|--------|--------|--|
| 1   | AY.107   | L5F    | D80Y   | G142D  |        |        |        |       |       |        |        |        |  |
|     |          | 1      | 1      | 1      |        |        |        |       |       |        |        |        |  |
| 1   | AY.109   | S151G  | E484K  |        |        |        |        |       |       |        |        |        |  |
|     |          | 1      | 1      |        |        |        |        |       |       |        |        |        |  |
| 2   | AY.120   | Q493L  | A684V  | E702K  |        |        |        |       |       |        |        |        |  |
|     |          | 1      | 1      | 1      |        |        |        |       |       |        |        |        |  |
| 45  | AY.121   | A67V   | ΔH69   | ΔV70   | E96A   | S98P   | D111N  | G142D | S349A | L452W  | P479L  | N536Y  |  |
|     |          | 2      | 2      | 2      | 1      | 6      | 1      | 17    | 1     | 1      | 1      | 1      |  |
|     |          | A684V  | S708F  | L1063F | D1118Y | V1264L |        |       |       |        |        |        |  |
|     |          | 1      | 2      | 1      | 1      | 1      |        |       |       |        |        |        |  |
| 115 | AY.122   | L8F    | L18F   | T22I   | L24S   | A27S   | A67V   | ΔH69  | ΔV70  | V83F   | T95I   | D111N  |  |
|     |          | 1      | 1      | 2      | 1      | 1      | 1      | 2     | 2     | 1      | 4      | 1      |  |
|     |          | T124I  | ΔG142  | G142D  | ΔV143  | ΔY144  | Y145D  | E224Q | T240I | W258R  | L276I  | R346I  |  |
|     |          | 1      | 1      | 42     | 1      | 1      | 1      | 1     | 2     | 1      | 1      | 1      |  |
|     |          | V433I  | S494L  | V503F  | A522V  | T573I  | Q613H  | A623V | Q677H | S680P  | A688V  | S704L  |  |
|     |          | 1      | 1      | 1      | 1      | 3      | 3      | 1     | 1     | 8      | 8      | 3      |  |
|     |          | T723I  | T747I  | P812L  | K814R  | A846V  | Q853R  | T859I | S939F | A1020S | T1027I | A1078S |  |
|     |          | 1      | 2      | 1      | 1      | 1      | 1      | 2     | 1     | 2      | 1      | 2      |  |
|     |          | V1176F | G1219V | V1228L | M1229I | C1247F | V1264L |       |       |        |        |        |  |
| 7   | 1        | 1      | 1      | 3      | 1      |        |        |       |       |        |        |        |  |
| 1   | AY.124.1 | A222S  |        |        |        |        |        |       |       |        |        |        |  |
|     |          | 1      |        |        |        |        |        |       |       |        |        |        |  |
| 3   | AY.125   | G142D  |        |        |        |        |        |       |       |        |        |        |  |
|     |          | 1      |        |        |        |        |        |       |       |        |        |        |  |
| 18  | AY.126   | A67V   | ΔH69   | ΔV70   | E132Q  | G142D  | N188S  | V289L | N532S | D574Y  | V622F  | S689I  |  |
|     |          | 1      | 1      | 1      | 1      | 4      | 1      | 1     | 1     | 1      | 8      | 1      |  |
|     |          | S689R  | V1228L | C1243R | C1250F |        |        |       |       |        |        |        |  |
|     |          | 1      | 8      | 1      | 1      |        |        |       |       |        |        |        |  |
| 44  | AY.127   | V6F    | L18F   | A67V   | ΔH69   | ΔV70   | ΔY144  | R246T | E516Q | L821V  | D1260Y |        |  |
|     |          | 1      | 3      | 1      | 1      | 1      | 1      | 1     | 1     | 8      | 1      |        |  |
| 1   | AY.127.2 | V860I  |        |        |        |        |        |       |       |        |        |        |  |

|     |           |                                                                           |
|-----|-----------|---------------------------------------------------------------------------|
| 2   | AY.128    | 1                                                                         |
|     |           | S221L E1150D                                                              |
|     |           | 2 2                                                                       |
| 337 | BA.1      | L5F H49Y S71F G72E E96V N196S ins210IV L212E V213P ins214ETE R214E        |
|     |           | 1 1 2 1 2 1 1 1 1 1 1                                                     |
|     |           | A222V R237K F238L ΔL241 ΔL242 ΔA243 W258C T323I S371F F392L D427Y         |
|     |           | 1 3 1 1 1 1 1 1 1 1 1                                                     |
|     |           | E484S V511A N540S Q613E Q628R Q675L A701V A899S Q1005H P1162L D1184Y      |
|     |           | 1 1 1 1 1 1 1 2 3 1 1                                                     |
|     |           | E1202Q                                                                    |
|     |           | 1                                                                         |
|     |           | L5F H49Y G75V ΔD138 D138G ΔP139 ΔF140 ΔL141 Y144V D215Y S254F             |
|     |           | 4 1 1 1 1 1 1 1 1 1 1                                                     |
| 529 | BA.1.1    | P272L T286I V308L T430I G476S L585F A623V H625R A647V R683W T778I         |
|     |           | 3 1 1 2 1 1 1 2 2 1 1                                                     |
|     |           | A846G R847T L938F A1015S A1070S F1095L P1112L R1185H E1202G K1205N V1228L |
|     |           | 1 1 2 1 10 1 1 2 1 3 1                                                    |
|     |           | C1253W                                                                    |
|     |           | 6                                                                         |
|     |           | S46L ΔE156 ΔF157 R158G R190G I931V N960K                                  |
| 71  | BA.1.1.1  | 1 1 1 1 1 2 1                                                             |
| 157 | BA.1.1.15 | L5F P9Q H49Y Q52K S151I F490V D574H A626T S691P E702Q A846V               |
|     |           | 1 1 14 1 1 2 1 1 1 3 1                                                    |
|     |           | E1144D P1162S I1169V V1177I C1247F D1259Y                                 |
|     |           | 1 1 1 2 2 1                                                               |
| 1   | BA.1.10   | S1030A                                                                    |
|     |           | 1                                                                         |
| 25  | BA.1.15   | M153I Q1005H                                                              |
|     |           | 1 1                                                                       |
| 14  | BA.1.15.1 | F238L P1263L                                                              |
|     |           | 1 2                                                                       |

|      |           |        |        |           |        |        |        |        |        |           |        |           |  |
|------|-----------|--------|--------|-----------|--------|--------|--------|--------|--------|-----------|--------|-----------|--|
| 16   | BA.1.16   | V16I   | A1020S | V1264M    |        |        |        |        |        |           |        |           |  |
|      |           | 1      | 1      | 7         |        |        |        |        |        |           |        |           |  |
| 99   | BA.1.17   | L5F    | T95V   | Q218R     | P251T  | E309Q  | G476S  | A626S  | S691P  | A701V     | K835I  | A879S     |  |
|      |           | 1      | 1      | 1         | 1      | 1      | 1      | 1      | 1      | 3         | 1      | 1         |  |
| 194  | BA.1.17.2 | L5F    | V127F  | ins214ELE | G219D  | D253G  | E309Q  | N450K  | V622A  | F643L     | S810T  | Y873H     |  |
|      |           | 3      | 2      | 1         | 2      | 2      | 2      | 1      | 1      | 4         | 1      | 1         |  |
|      |           | P1162S | V1228L |           |        |        |        |        |        |           |        |           |  |
|      |           | 2      | 7      |           |        |        |        |        |        |           |        |           |  |
|      |           | L5F    | T19L   | T33K      | I68T   | ΔH69   | ΔV70   | V70G   | S98F   | N99D      | ΔL141  | ΔG142     |  |
| 1185 | BA.2      | 6      | 1      | 1         | 1      | 9      | 9      | 1      | 1      | 3         | 1      | 1         |  |
|      |           | ΔV143  | ΔY144  | H146Y     | K147I  | M153T  | M153V  | L176F  | ΔN211  | ins212SGR | L212I  | ins214EPE |  |
|      |           | 1      | 1      | 1         | 1      | 1      | 1      | 4      | 1      | 1         | 1      | 1         |  |
|      |           | ΔL242  | ΔA243  | S254F     | S255F  | A260T  | A263T  | T323I  | R346K  | R346T     | K356T  | R357K     |  |
|      |           | 1      | 1      | 2         | 1      | 1      | 1      | 1      | 3      | 1         | 1      | 2         |  |
|      |           | S371L  | N556K  | T573I     | D627G  | P631S  | V635A  | Q677H  | N679R  | A701V     | S704L  | T719I     |  |
|      |           | 2      | 2      | 2         | 2      | 1      | 1      | 1      | 1      | 5         | 8      | 1         |  |
|      |           | Q755H  | R765L  | A831V     | A846G  | S884F  | A892V  | L938F  | S939F  | T1009I    | A1070V | T1076I    |  |
|      |           | 1      | 3      | 1         | 2      | 1      | 2      | 1      | 1      | 1         | 1      | 1         |  |
|      |           | D1084N | R1091L | Q1113R    | I1114L | T1117I | G1124V | D1146Y | P1162R | P1162S    | D1168G | R1185S    |  |
|      |           | 2      | 1      | 1         | 1      | 2      | 1      | 1      | 1      | 4         | 1      | 1         |  |
|      |           | D1199G | D1199N | L1200F    | Q1201K | E1202K | E1207D | G1219V | A1222S | C1236F    | C1236Y | S1239I    |  |
|      |           | 1      | 1      | 1         | 1      | 1      | 2      | 1      | 1      | 2         | 1      | 2         |  |
|      |           | K1266R |        |           |        |        |        |        |        |           |        |           |  |
|      |           | 1      |        |           |        |        |        |        |        |           |        |           |  |
| 9    | BA.2.1    | G219S  | L368I  | P1143S    | N978S  |        |        |        |        |           |        |           |  |
|      |           | 1      | 1      | 1         | 1      |        |        |        |        |           |        |           |  |
| 1    | BA.2.2    | I1221T |        |           |        |        |        |        |        |           |        |           |  |
|      |           | 1      |        |           |        |        |        |        |        |           |        |           |  |
| 49   | BA.2.3    | T676I  | S691P  | M1237T    |        |        |        |        |        |           |        |           |  |
|      |           | 1      | 1      | 1         |        |        |        |        |        |           |        |           |  |
| 6    | BA.2.3.20 | K147N  | S640P  |           |        |        |        |        |        |           |        |           |  |

|     |           |        |        |       |       |        |        |        |        |       |       |       |  |
|-----|-----------|--------|--------|-------|-------|--------|--------|--------|--------|-------|-------|-------|--|
|     |           | 1      | 1      |       |       |        |        |        |        |       |       |       |  |
| 5   | BA.2.5    | K444R  |        |       |       |        |        |        |        |       |       |       |  |
|     |           | 4      |        |       |       |        |        |        |        |       |       |       |  |
| 128 | BA.2.9    | L5F    | W64R   | ΔK182 | ΔQ183 | ΔG184  | ΔN185  | ΔF186  | P209L  | D215G | L249S | R346K |  |
|     |           | 1      | 1      | 1     | 1     | 1      | 1      | 1      | 1      | 1     | 1     | 1     |  |
|     |           | S371L  | L452R  | N641Y | L938F | Q1005H | D1163Y | V1264L | K1266E |       |       |       |  |
|     |           | 1      | 1      | 1     | 1     | 1      | 1      | 2      | 1      |       |       |       |  |
| 2   | BA.2.9.3  | A93S   |        |       |       |        |        |        |        |       |       |       |  |
|     |           | 1      |        |       |       |        |        |        |        |       |       |       |  |
| 2   | BA.2.9.5  | A771S  |        |       |       |        |        |        |        |       |       |       |  |
|     |           | 1      |        |       |       |        |        |        |        |       |       |       |  |
| 8   | BA.2.10   | W64R   | A623S  |       |       |        |        |        |        |       |       |       |  |
|     |           | 3      | 1      |       |       |        |        |        |        |       |       |       |  |
| 47  | BA.2.12.1 | H49Y   | ΔY145  | ΔH146 | N164K | W258C  | Q613H  | S939F  |        |       |       |       |  |
|     |           | 1      | 1      | 1     | 1     | 1      | 5      | 1      |        |       |       |       |  |
| 3   | BA.2.18   | G261V  |        |       |       |        |        |        |        |       |       |       |  |
|     |           | 1      |        |       |       |        |        |        |        |       |       |       |  |
| 45  | BA.2.37   | A1016V | G1099D |       |       |        |        |        |        |       |       |       |  |
|     |           | 1      | 1      |       |       |        |        |        |        |       |       |       |  |
| 6   | BA.2.65   | Y248S  |        |       |       |        |        |        |        |       |       |       |  |
|     |           | 1      |        |       |       |        |        |        |        |       |       |       |  |
| 1   | BA.2.72   | D215E  |        |       |       |        |        |        |        |       |       |       |  |
|     |           | 1      |        |       |       |        |        |        |        |       |       |       |  |
| 1   | BA.2.78   | R346T  | L452M  |       |       |        |        |        |        |       |       |       |  |
|     |           | 1      | 1      |       |       |        |        |        |        |       |       |       |  |
| 48  | BA.4      | G181R  | R346S  | F543V | F565I | N658S  | A845S  | D936N  | S939F  |       |       |       |  |
|     |           | 2      | 1      | 1     | 1     | 32     | 2      | 2      | 2      |       |       |       |  |
| 22  | BA.4.1    | I210T  | D215H  | H245Y | V341L | R346T  | N354D  | D389N  | K444R  | Q675H | K854R | D936Y |  |
|     |           | 2      | 1      | 2     | 1     | 4      | 1      | 2      | 1      | 1     | 2     | 1     |  |
|     |           | V1122M | G1251R |       |       |        |        |        |        |       |       |       |  |
|     |           | 1      | 3      |       |       |        |        |        |        |       |       |       |  |

[illegible]



|     |           |        |        |        |        |        |       |       |       |       |       |       |
|-----|-----------|--------|--------|--------|--------|--------|-------|-------|-------|-------|-------|-------|
| 139 | BA.5.2.1  | 1      | 1      | 1      | 1      | 1      | 1     | 5     | 1     |       |       |       |
|     |           | L5F    | V6F    | Q14H   | N30S   | H66R   | P82H  | K97R  | ΔY144 | M177I | G181E | G181V |
|     |           | 1      | 7      | 1      | 1      | 9      | 1     | 1     | 1     | 2     | 1     | 1     |
|     |           | Q183L  | V213E  | R214H  | F220L  | E224Q  | V445A | Y508H | T572I | A623S | L822F | S939F |
|     |           | 1      | 2      | 2      | 1      | 1      | 2     | 1     | 1     | 1     | 1     | 4     |
|     |           | Q1071R | E1182Q | D1184G | E1195V |        |       |       |       |       |       |       |
| 11  | BF.1      | 1      | 1      | 2      | 2      |        |       |       |       |       |       |       |
|     |           | H146Q  | V445F  | N460I  |        |        |       |       |       |       |       |       |
| 3   | BF.4      | 1      | 1      | 1      |        |        |       |       |       |       |       |       |
|     |           | ΔY144  | A783S  |        |        |        |       |       |       |       |       |       |
| 25  | BF.5      | 1      | 2      |        |        |        |       |       |       |       |       |       |
|     |           | P39S   | Y248H  | A653V  | D1084E | D1260Y |       |       |       |       |       |       |
| 15  | BF.7      | 1      | 1      | 1      | 1      | 3      |       |       |       |       |       |       |
|     |           | P9S    | V1264L |        |        |        |       |       |       |       |       |       |
| 1   | BF.7.4.2  | 1      | 2      |        |        |        |       |       |       |       |       |       |
|     |           | ΔA27   |        |        |        |        |       |       |       |       |       |       |
| 5   | BF.10     | 1      |        |        |        |        |       |       |       |       |       |       |
|     |           | P272L  |        |        |        |        |       |       |       |       |       |       |
| 11  | BF.11     | 1      |        |        |        |        |       |       |       |       |       |       |
|     |           | N1023Y |        |        |        |        |       |       |       |       |       |       |
| 1   | BF.19     | 3      |        |        |        |        |       |       |       |       |       |       |
|     |           | ΔY144  |        |        |        |        |       |       |       |       |       |       |
| 12  | BA.5.2.20 | 1      |        |        |        |        |       |       |       |       |       |       |
|     |           | S98F   | V642G  |        |        |        |       |       |       |       |       |       |
| 1   | BA.5.2.26 | 1      | 2      |        |        |        |       |       |       |       |       |       |
|     |           | R346I  |        |        |        |        |       |       |       |       |       |       |
| 30  | BE.1      | 1      |        |        |        |        |       |       |       |       |       |       |
|     |           | A67T   | P793L  | A958S  | T1273I |        |       |       |       |       |       |       |
| 28  | BE.1.1    | 2      | 1      | 2      | 1      |        |       |       |       |       |       |       |
|     |           | I101T  | R214H  | T284I  | S297A  | E484V  | I742V | T747I | S929I |       |       |       |
|     |           | 1      | 1      | 1      | 1      | 1      | 1     | 2     | 1     |       |       |       |

|    |           |                                          |
|----|-----------|------------------------------------------|
| 4  | BE.1.1.1  | T430I                                    |
|    |           | 1                                        |
| 2  | BQ.1      | R346T    V1040F    M1050I                |
|    |           | 2            2            2              |
| 7  | BQ.1.1    | P209S    G219C    S939F    M1050I        |
|    |           | 1            1            1            1 |
| 2  | BQ.1.1.11 | S494P                                    |
|    |           | 2                                        |
| 1  | BQ.1.8    | L5F                                      |
|    |           | 1                                        |
| 7  | BA.5.3.3  | G181V                                    |
|    |           | 1                                        |
| 5  | BA.5.6    | L5F                                      |
|    |           | 1                                        |
| 11 | BA.5.9    | L249F                                    |
|    |           | 1                                        |

<sup>a</sup>The most prevalent mutations shown in Table S2 were determined in accordance to the most prevalent mutations of these lineages in this dataset, and as denoted by the CoV-Spectrum [1] (<http://cov-spectrum.org/>)(date last accessed 23 May 2023) and Outbreak.info [2] (<http://outbreak.info/>)(date last accessed 23 May 2023) websites.

<sup>b</sup>Total number of sequences that were identified for each lineage in this dataset.

<sup>c</sup>For lineages that were identified in lower frequency in this dataset, the CoV-Spectrum [1] (<http://cov-spectrum.org/>)( date last accessed 23 May 2023) and Outbreak.info [2] (<http://outbreak.info/>)( date last accessed 23 May 2023) websites were used to indicate the expected common mutations and deletions.



**Figure S1. The postulated sequencing results from ARTIC V3 primer pairs 72 and 73. (A)** Graphical representation of the amplicons of ARTIC V3 primer pairs 72 and 73. The gray cylinders indicate the region of amplification of each primer pair and the intermittent cylinders serve to show that the amplicon continues past the nucleotides indicated in (B). **(B)** The region of the SARS-CoV-2 genome where the left primer of primer pair 73 and the right primer of primer pair 72 bind. The region where each primer binds to is highlighted in gray. The numbers above the reference SARS-CoV-2 strain (GenBank: MN908947.3) correspond to the start and end of the genetic region that was isolated to indicate the primer binding sites (numbering based on the MN908947 genome). Directly above the nucleotide sequence of MN908947.3 are the left primer of ARTIC V3 primer pair 73 “nCoV-2019\_73\_LEFT” (in 5’ to 3’ orientation) and the right primer of ARTIC V3 primer pair 72 (in 3’ to 5’ orientation, complement). The nucleotide positions that they bind to are indicated in the parenthesis. Directly below the nucleotide sequence of MN908947.3 are the translated amino acids of the S-protein, and the numbers on the left and right of this amino acid sequence correspond to the start and end of this isolated region. The second and third genomes indicated in (B) represent sequences of the Delta variant B.1.617.2&AY. and Omicron 1 variant. The red letters indicate the characteristic nucleotide deletions of the Delta and Omicron variants. **(C)** The postulated consensus sequences of ARTIC V3 primer pair 72 in Omicron and ARTIC V3 primer pair 73 in Delta. Directly below the consensus sequences, are representative next generation sequencing fragments from the Omicron consensus sequence shown in (B) that cover the end of the right 72 primer, and representative next generation sequencing fragments from the Delta consensus sequence shown in (B), that cover the beginning of the left 73 primer.

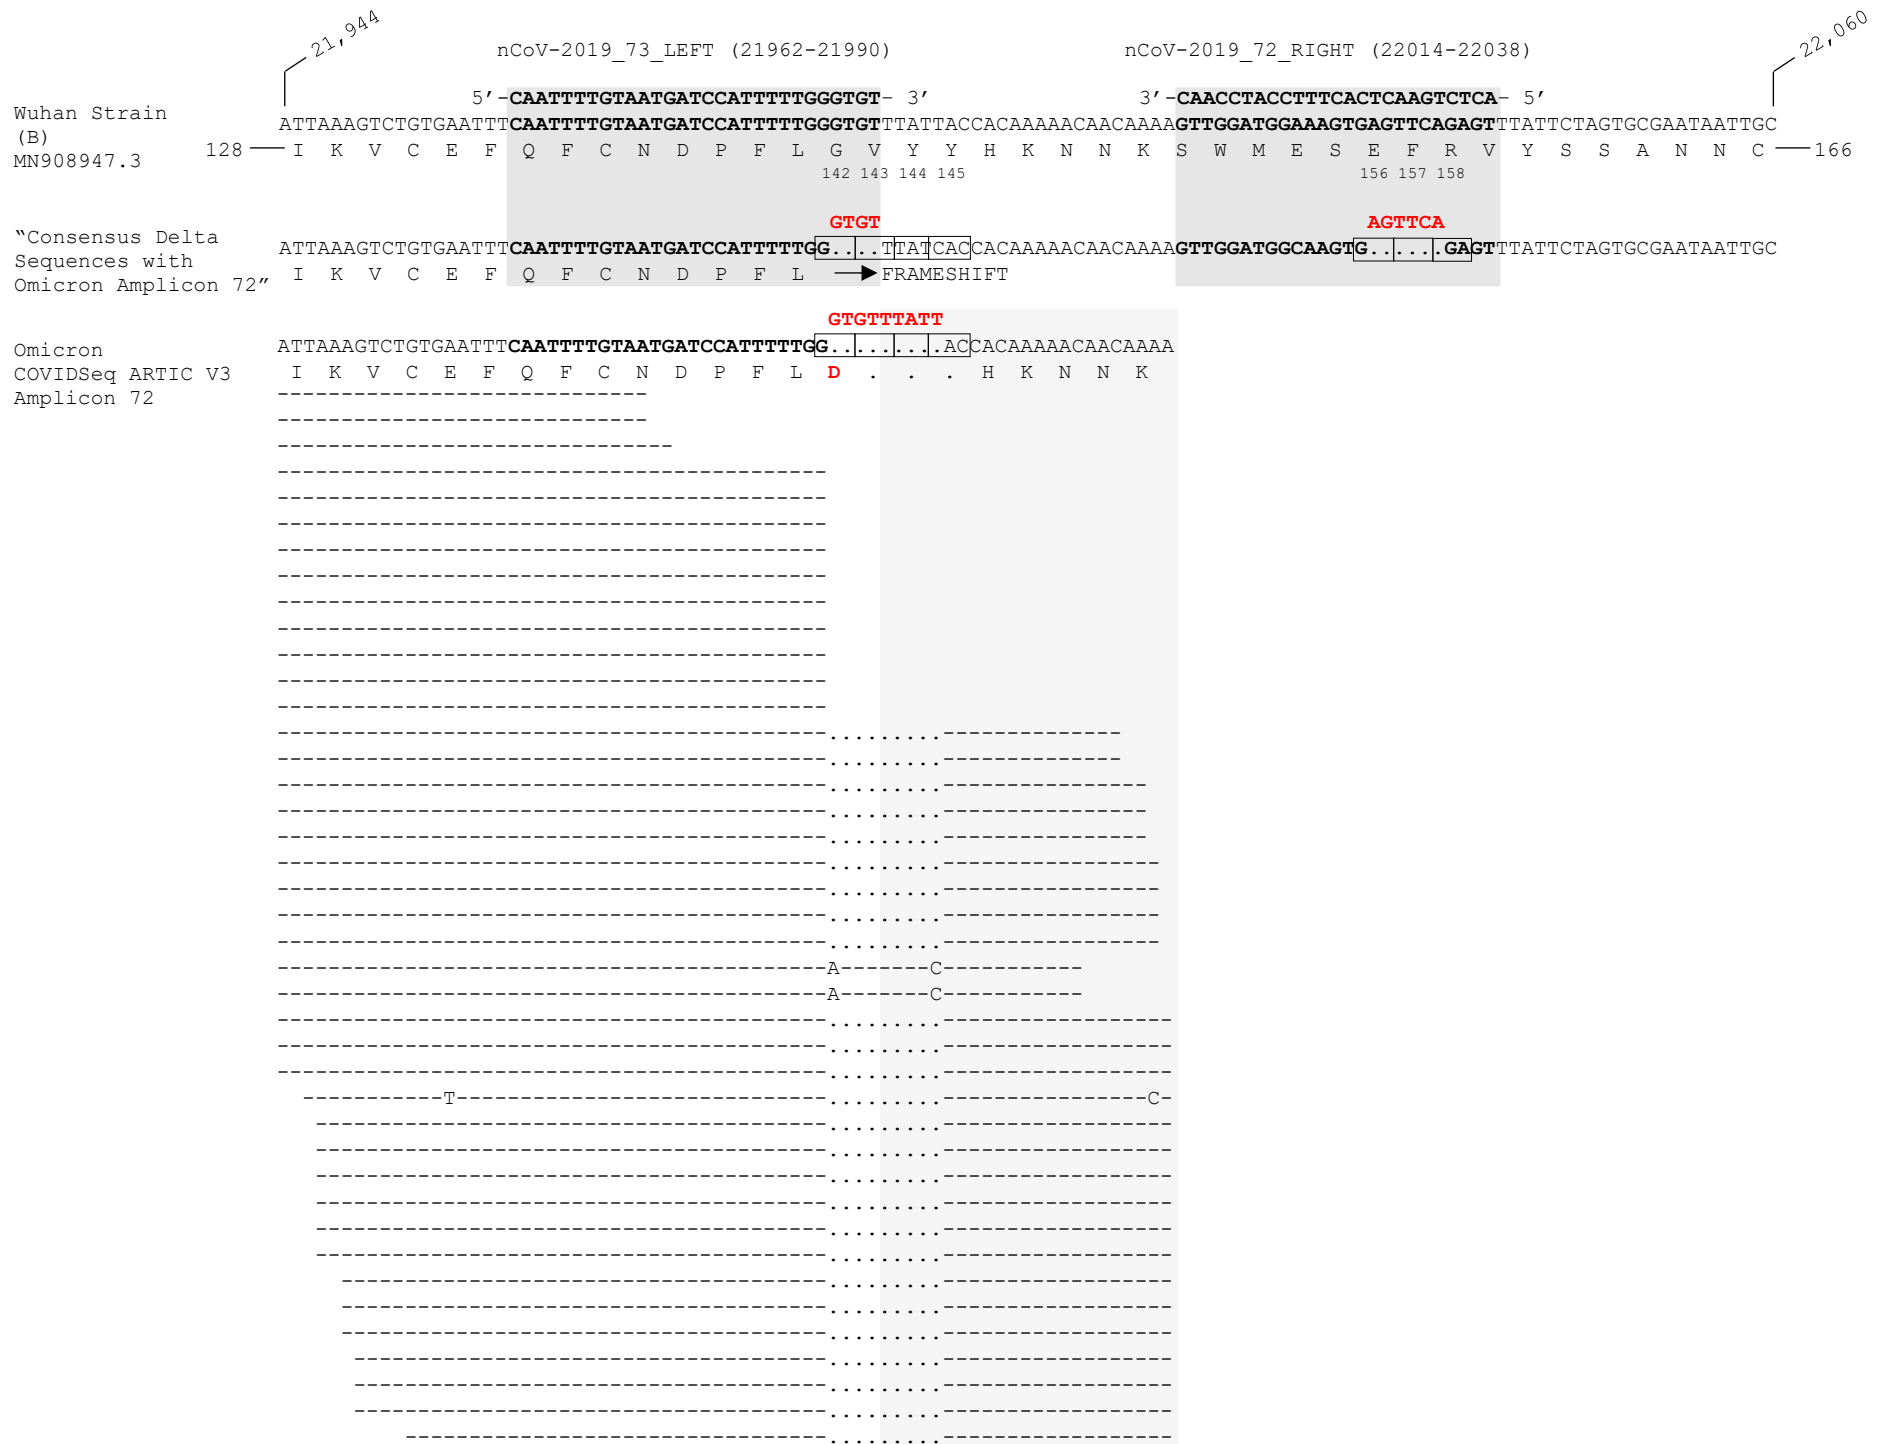

[illegible]

Delta  
COVIDSeq ARTIC V3  
Amplicon 73

[illegible]

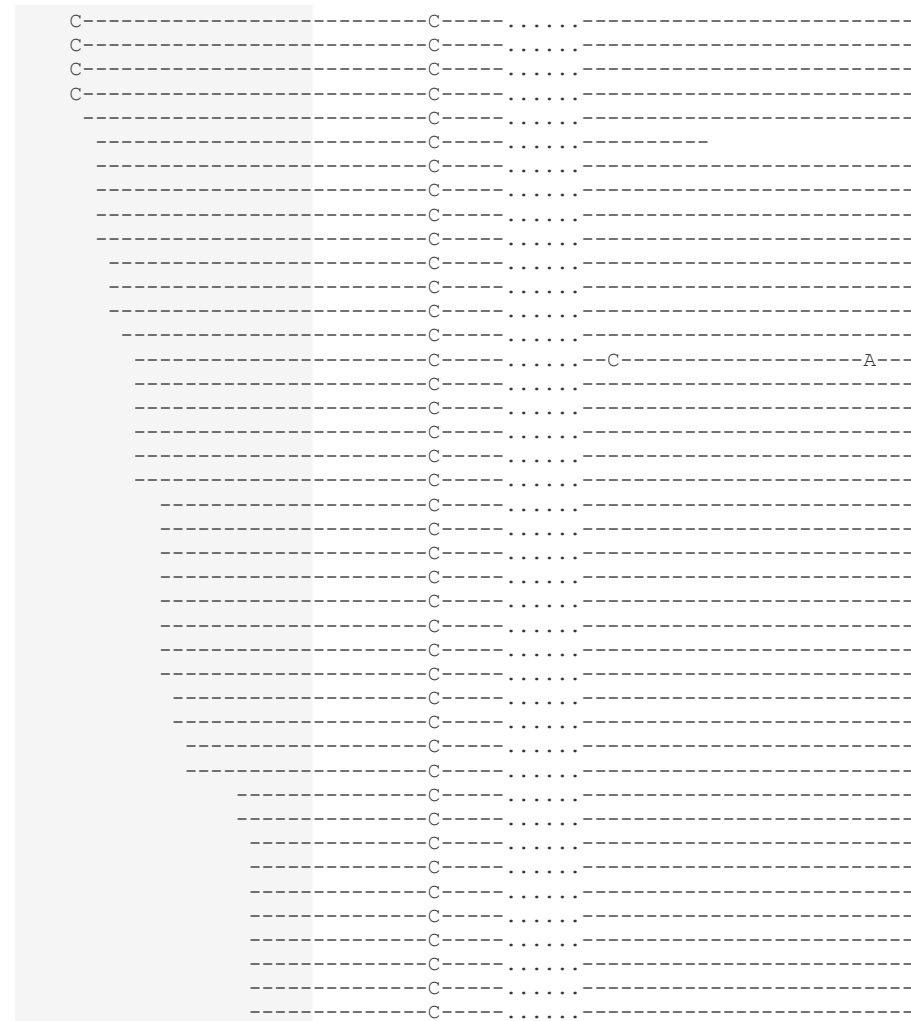

**Figure S2. The sequencing results from ARTIC V3 primer pairs 72 and 73 of a Delta sample with a frameshift due to 4-nucleotide deletion at positions 21,987-21,990 .** The top genome represents the reference SARS-CoV-2 Wuhan strain MN908947.3 (GenBank ID), showing the region that encompasses the left ARTIC V3 primer 73 and the right ARTIC V3 primer 72. The target recognition sequence of each primer is highlighted in gray. The numbers above the reference SARS-CoV-2 genome correspond to the start and end of the genetic region that was isolated to indicate the primer binding sites (numbering based on the MN908947.3 genome). Directly above the nucleotide sequence of MN908947.3 are the left primer of ARTIC V3 primer pair 73 “nCoV-2019\_73\_LEFT” (in 5’ to 3’ orientation) and the right primer of ARTIC V3 primer pair 72 (in 3’ to 5’ orientation, complement). The nucleotide positions that the ARTIC V3 primers 72 right and 73 left bind to are indicated in the parenthesis. Directly below the nucleotide sequence of MN908947.3 are the translated amino acids of the S-protein, and the numbers on the left and right of this amino acid sequence correspond to the start and end of this isolated region. The second genome indicated below MN908947.3 represents the consensus sequence of the AY.4.2 sample. The red characters indicate deleted nucleotides and corresponding amino acid changes of the consensus sequence of AY.4.2 relative to the MN908947.3 sequence. Directly below the AY.4.2 consensus sequence, are representative next generation sequencing fragments that cover the end of the right ARTIC V3 primer 72, and representative next generation sequencing fragments from that cover the beginning of the left ARTIC V3 primer 73.





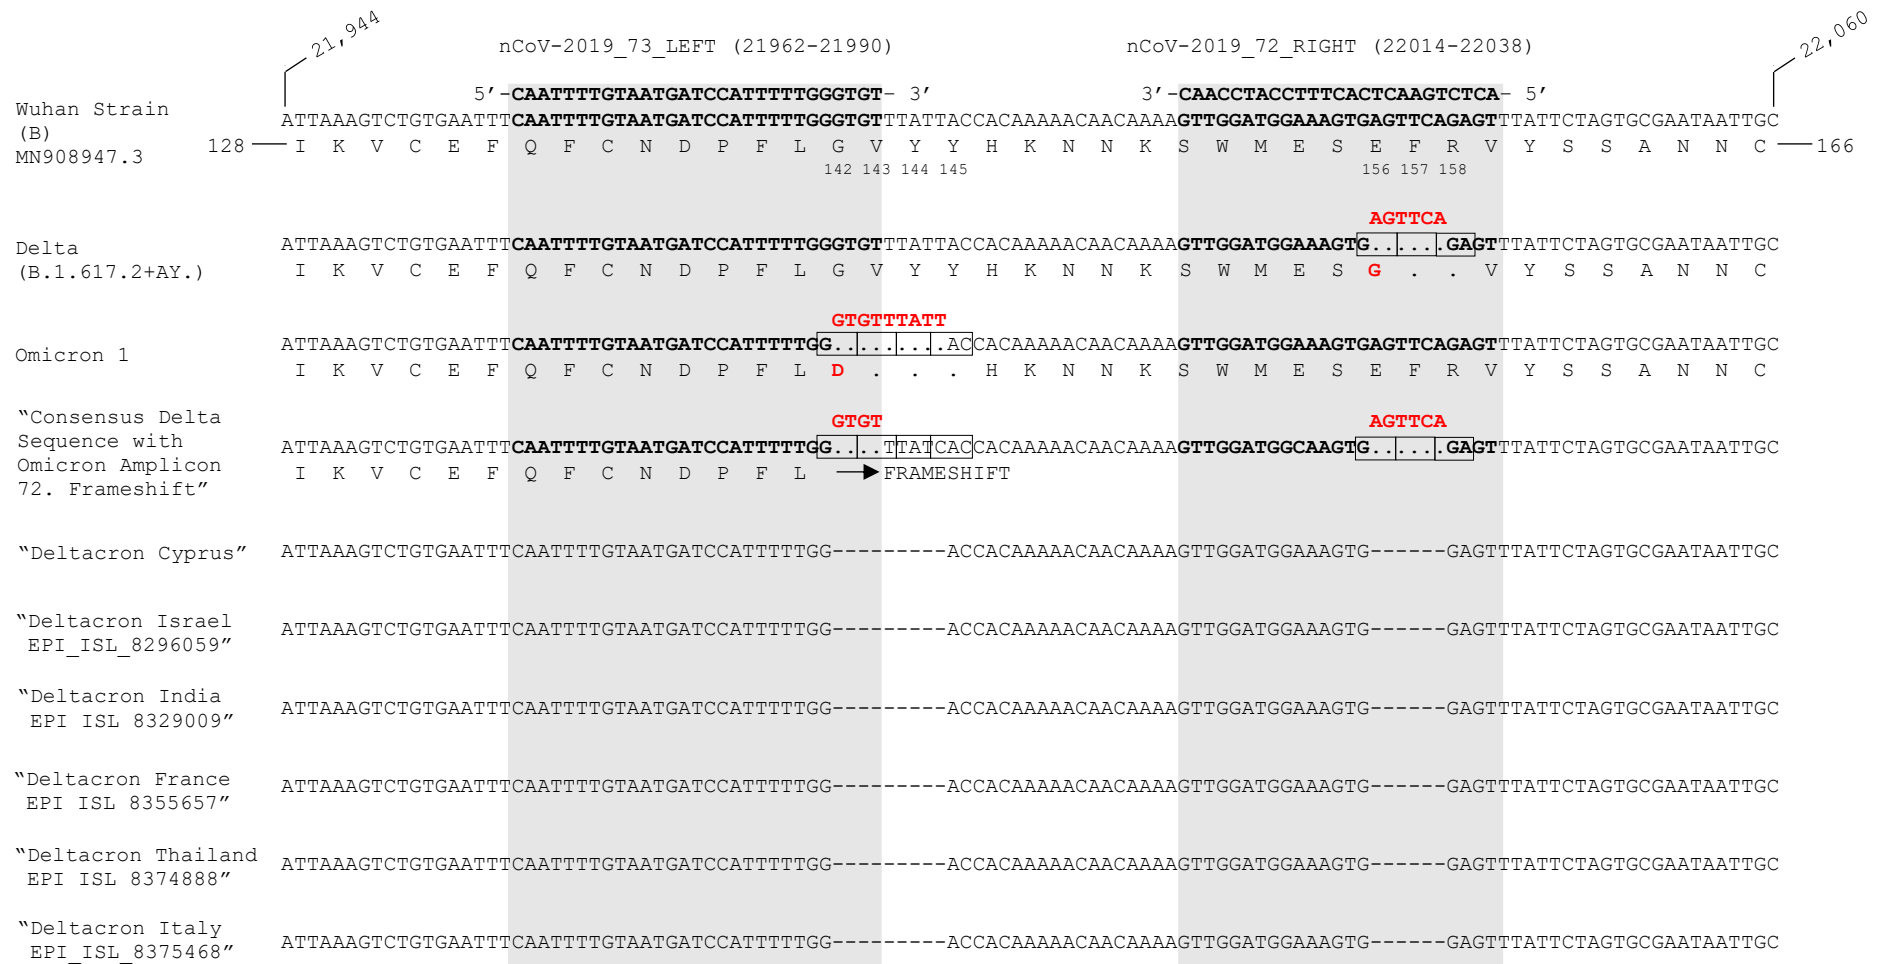

**Figure S4. Alignment of representative Deltacron sequences from Cyprus and other countries.** The top genome represents the reference SARS-CoV-2 Wuhan strain MN908947.3 (GenBank ID), showing the region that encompasses the left ARTIC V3 primer 73 and the right ARTIC V3 primer 72. The target recognition sequence of each primer is highlighted in gray. The numbers above the reference SARS-CoV-2 genome correspond to the start and end of the genetic region that was isolated to indicate the primer binding sites (numbering based on the MN908947.3 genome). Directly above the nucleotide sequence of MN908947.3 are the left primer of ARTIC V3 primer pair 73 "nCoV-2019\_73\_LEFT" (in 5' to 3' orientation) and the right primer of ARTIC V3 primer pair 72 (in 3' to 5' orientation, complement). The nucleotide positions that the ARTIC V3 primers 72 right and 73 left bind to are indicated in the parenthesis. Directly below the nucleotide sequence of MN908947.3 are the translated amino acids of the S-protein, and the numbers on the left and right of this amino acid sequence correspond to the start and end of this isolated region. The second and third genomes represent sequences of the Delta variant B.1.617.2&AY. and Omicron 1 variant. The red letters indicate the characteristic nucleotide deletions of the Delta and Omicron variants. The fourth genome indicated below MN908947.3 represents the consensus sequence of a Delta variant identified in our dataset with the frameshift resulting from a four-nucleotide deletion at positions 21,987-21,990 due to the ARTIC V3 right 72 primer amplifying Omicron 1, while ARTIC V3 left 73 primer amplifying Delta. The sequences below the fourth indicate Deltacron sequences from Cyprus and other countries, which do not contain the aforementioned four-nucleotide deletion, and as such do not have the frameshift.

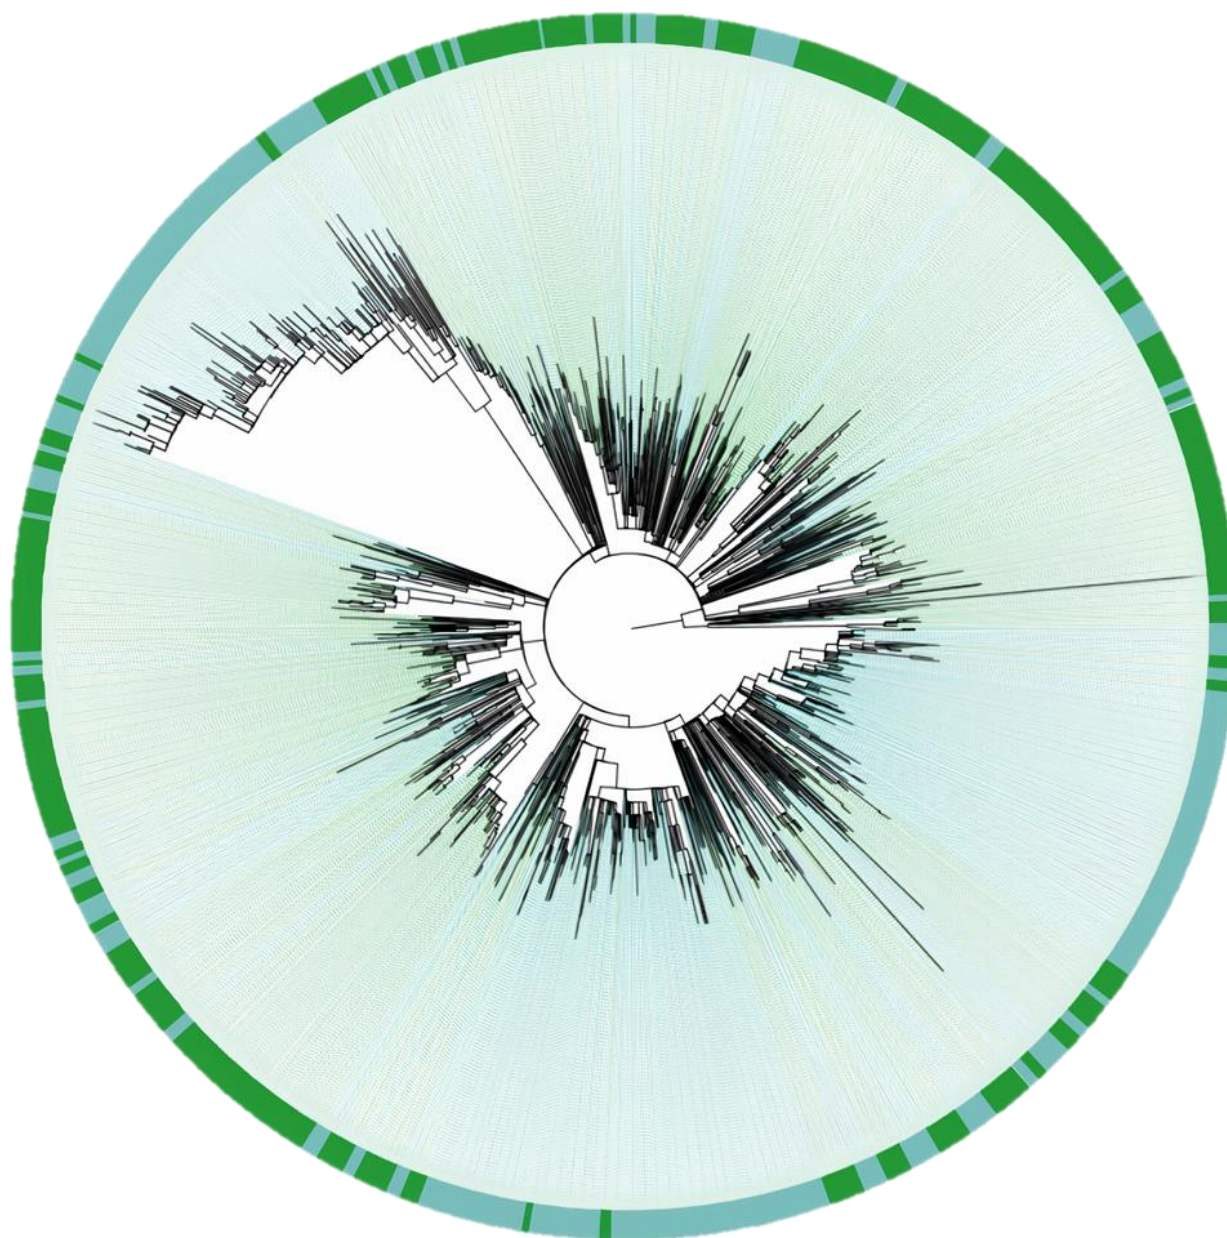

**Figure S5. Maximum likelihood phylogenetic tree construction encompassing Delta variants from the fourth and fifth waves of SARS-CoV-2 infection in Cyprus.** The Delta variant sequences highlighted in teal are predominantly from the fourth wave (previous study [3]), which present a more condensed clustering. The Delta variant sequences in green are primarily from the fifth wave of SARS-CoV-2 (current study), which present a more interspersed clustering.

## References

1. Chen, C.; Nadeau, S.; Yared, M.; Voinov, P.; Xie, N.; Roemer, C.; Stadler, T. CoV-Spectrum: analysis of globally shared SARS-CoV-2 data to identify and characterize new variants. *Bioinformatics* **2022**, *38*, 1735–1737, doi:10.1093/bioinformatics/btab856.
2. Gangavarapu, K.; Latif, A.A.; Mullen, J.L.; Alkuzweny, M.; Hufbauer, E.; Tsueng, G.; Haag, E.; Zeller, M.; Aceves, C.M.; Zaiets, K.; et al. Outbreak.info genomic reports: scalable and dynamic surveillance of SARS-CoV-2 variants and mutations. *Nat. Methods* **2023**, *20*, 512–522, doi:10.1038/s41592-023-01769-3.
3. Chrysostomou, A.C.; Vrancken, B.; Haralambous, C.; Alexandrou, M.; Aristokleous, A.; Christodoulou, C.; Gregoriou, I.; Ioannides, M.; Kalakouta, O.; Karagiannis, C.; et al. Genomic Epidemiology of the SARS-CoV-2 Epidemic in Cyprus from November 2020 to October 2021: The Passage of Waves of Alpha and Delta Variants of Concern. *Viruses* **2022**, *15*, 108, doi:10.3390/v15010108.
